# Supplementary material for: LHX2 is a direct NF-κB target gene that promotes primary hair follicle placode down-growth
Source: Oxford University Press journal article supplement (doi:10.1242/dev.130898), 2016-01-01
Supplement: dev130898supp.pdf [file dev130898supp.pdf]

## Supplementary Materials and Methods

### In situ hybridization probes

In situ hybridization was carried out using the following mouse cDNA probe templates: pSport1-Fn1-31-38 (nt +4891 - +6157), pCMV-Sport6-Cd74 (IMAGE ID 2650401), pBSK-Prokr2-II (nt -275 - +741), pBSK-Nrp2-II (nt +1147 - +3503), pBSK-Gli1 and pBSK-Sox9 (kindly provided by T. Willnow), pCMV-Sport6.1-Frem1 (IMAGE ID 6510171), pCMV-Sport6.1-Mmp9 (IMAGE ID 6309245), pCMV-Sport6-Etv4 (IMAGE ID 4021693), pYX-Asc-Scube1 (IMAGE ID 6850999), pFLCI-Madcam1 (FANTOM Full Length cDNA clone 9430044H04), pGEM-Foxi3 (nt 3851 - 4461, GeneID: 232077), pGEM-Ascl4 (nt -180 - +785, GeneID:67341), pCR-BluntII-TOPO-Tnc (IMAGE ID 40099596), pCMV-Sport6-Pthlh (IMAGE ID 3594509), pYX-Asc-Tnfaip3 (IMAGE ID 6838303), pCR-BluntII-TOPO-Tsku (IMAGE-ID 40095311), pGEM-Ctgf (kindly provided by M. Mikkola), Bmp2 and Ptch1 (kindly provided by J. Huelsken).

### qRT-PCR primers

Reference genes :

|                           |                             |
|---------------------------|-----------------------------|
| mActb_RT_fwd sense:       | 5' TTACTGCTCTGGCTCCTAG 3'   |
| mActb_RT_rev antisense:   | 5' CTCATCGTACTCCTGCTTG 3'   |
| mGapdh_RT_fwd2 sense:     | 5'TGTGAACCACGAGAAATATGAC 3' |
| mGapdh_RT_rev2 antisense: | 5' GTGATGGCATGGACTGTG 3'    |
| mHmbs_RT_fwd sense:       | 5' CTGAAAGCCTTGTACCCTG 3'   |
| mHmbs_RT_rev antisense:   | 5' GCGTTTTCTAGCTCCTTGG 3'   |

Target genes:

|                            |                              |
|----------------------------|------------------------------|
| mAscl4_RT_fwd2 sense:      | 5' TAGCAGCATCCTAGCCCACT 3'   |
| mAscl4_RT_rev2 antisense:  | 5' ACTCGGAACCAATGAAGGTG 3'   |
| mBmp2_RT_fwd sense:        | 5' GCAGCTTCCATCACGAA 3'      |
| mBmp2_RT_rev antisense:    | 5' TTCCTGTATCTGTTCCCG 3'     |
| mBmp4_RT_fwd2 sense        | 5' GTAGTGCCATTCGGAGCG 3'     |
| mBmp4_RT_rev2 antisense    | 5' ATCAGCATTCGGTTACCAGG 3'   |
| mCd74_RT_fwd sense:        | 5' GAAATCTGCCAAACCTGTG 3'    |
| mCd74_RT_rev antisense:    | 5' GGTGATGTTGCCGTAATT 3'     |
| mColl1a1_RT_fwd1 sense     | 5' CTGCACGAGTCACACCGGAA 3'   |
| mColl1a1_RT_rev1 antisense | 5' GGGAGGGAACCAGATTGGGG 3'   |
| mCtgf_RT_fwd sense:        | 5' CCACCCGAGTTACCAATG 3'     |
| mCtgf_RT_rev antisense:    | 5' TGGCGATTTTAGGTGTCC 3'     |
| mDkk4_RT_fwd sense:        | 5' AGCAGAGGAAAACAGACC 3'     |
| mDkk4_RT_rev antisense:    | 5' CCACAGTCAGAGGTTCTAAG 3'   |
| mEdaR_RT_fwd2 sense:       | 5' GGATGTGTATGCCAACGTG 3'    |
| mEdaR_RT_rev2 antisense:   | 5' GCCATGTTTTACGACCG 3'      |
| mEtv4_RT_fwd sense:        | 5' ACCTCAGTCACTTCCAAGAG 3'   |
| mEtv4_RT_rev antisense:    | 5' GTTCCTTCTTGATCCTGGTG 3'   |
| mEtv5_RT_fwd2 sense:       | 5' GCAGTTTGCCAGATTTTCA 3'    |
| mEtv5_RT_rev2 antisense:   | 5' GGCACTTTTCTCATACTTAGC 3'  |
| mFn1_RT_fwd sense:         | 5'GGAGAACAAAGACAGAGACAA 3'   |
| mFn1_RT_rev antisense:     | 5' GGTGGATCTTGTAGTCAGTG 3'   |
| mFoxi3_RT_fwd sense:       | 5' AACTCCATCCGCCACAAC 3'     |
| mFoxi3_RT_rev2 antisense:  | 5' CTTCCCACTCACTCTTAGTC 3'   |
| mFrem1_RT_fwd sense:       | 5' ACCAGTTCACAGTATATGCC 3'   |
| mFrem1_RT_rev antisense:   | 5' CCAGTTCATCCATGTGCC 3'     |
| mGli1_RT_fwd2 sense:       | 5' TCAATCCAATGACTCCACC 3'    |
| mGli1_RT_rev2 antisense:   | 5' GGACCCTGACATAAAGTTG 3'    |
| mIrx1_RT_fwd1 sense        | 5' ACCCAACTACAGCGCCTTCTT 3'  |
| mIrx1_RT_rev1 antisense    | 5' TCATACTGAGAGCCCATCTGCG 3' |
| mItgb8_RT_fwd sense:       | 5' GCAGCCTGGGTATTTTCAC 3'    |

|                             |                              |
|-----------------------------|------------------------------|
| mItgb8_RT_rev antisense:    | 5' GCACAGGAGACCACATTTG 3'    |
| mLhx2_RT_fwd sense:         | 5' GCAGCCAAAAGACAAAGCG 3'    |
| mLhx2_RT_rev antisense:     | 5' GTAAAAGGTTGCGCCTGAAC 3'   |
| mMadcam1_RT_fwd3 sense:     | 5' CCAATCTGTATGTTCTTGGC 3'   |
| mMadcam1_RT_rev3 antisense: | 5' TCTCTGCCTCCTTTAGTCTG 3'   |
| mMmp9_RT_fwd sense:         | 5' GGACAGCCAGACACTAAAG 3'    |
| mMmp9_RT_rev antisense:     | 5' CGGCAAGTCTTCAGAGTAG 3'    |
| mNcam1_RT_fwd sense:        | 5' CCCACAGGAGTTTAAGGAAG 3'   |
| mNcam1_RT_rev antisense:    | 5' GGACAGGACTATGAACCG 3'     |
| mNgfr_RT_fwd1 sense         | 5' GCCTGGACAGTGTTACGTTCTC 3' |
| mNgfr_RT_rev1 antisense     | 5' CGGACATACTCTGCAGGCC 3'    |
| mNrp1_RT_fwd sense:         | 5' TCCGAATCAAACCTGTATCCTG 3' |
| mNrp1_RT_rev antisense:     | 5'GATGCTGTAATCTGGGAGTCTG 3'  |
| mNrp2_RT_fwd sense:         | 5' TTCCTGACCTTTGACCTG 3'     |
| mNrp2_RT_rev antisense:     | 5' GGAGTTTGGAGGGTGTTT 3'     |
| mProkr2_RT_fwd sense:       | 5' CTCCGTCAACTACCTTCGTAC 3'  |
| mProkr2_RT_rev2 antisense:  | 5' GACCAAAGCGATCAGGAAGG 3'   |
| mPthlh_RT_fwd sense:        | 5' GGAGTGTCTTGGTATTCCTG 3'   |
| mPthlh_RT_rev antisense:    | 5' ACTTGCCCTTGTCATGC 3'      |
| mPtch1_RT_fwd sense:        | 5' GGTCTCGCTTACAAACTC 3'     |
| mPtch1_RT_rev antisense:    | 5' CGGTCAGGTAGATGTAGAAAG 3'  |
| mPtch2_RT_fwd2 sense:       | 5' GCTTACTTCCAAGGTCTACTC 3'  |
| mPtch2_RT_rev2 antisense:   | 5' AGTCTGAATCAACATCTGGG 3'   |
| mRelb_RT_fwd2 sense:        | 5' GCTGTACTTGCTCTGTGAC 3'    |
| mRelb_RT_rev2 antisense:    | 5' GGTGGCGTTTTGAACAC 3'      |
| mScube1_RT_fwd2 sense:      | 5' CCTTGCCCAAACCAGAAG 3'     |
| mScube1_RT_rev2 antisense:  | 5' GACCATCTGCATGTAAGGC 3'    |
| mSfrp1_RT_fwd sense:        | 5' CGGAAGCCTCTAAGCCC 3'      |
| mSfrp1_RT_rev antisense:    | 5' TCTTGTCACCGTTTTCTTTC 3'   |
| mShh_RT_fwd sense:          | 5' GGCAGATATGAAGGGAAGATC 3'  |
| mShh_RT_rev antisense:      | 5' CATTAACTTGTCTTTGCACC 3'   |
| mSox9_RT_fwd2 sense:        | 5' GCAAGACTCTGGGCAAG 3'      |
| mSox9_RT_rev2 antisense:    | 5' GCTGGTACTTGTAATCGGG 3'    |
| mSox21_RT_fwd sense:        | 5' TGGTGTTTGCTTTGCACTTC 3'   |
| mSox21_RT_rev antisense:    | 5' GGAGGGAGGAAGGATGAGAC 3'   |
| mTnc_RT_fwd sense:          | 5' GAGGACTTCTATCGCAACTGG 3'  |
| mTnc_RT_rev antisense:      | 5' CTTGGGCTGTGATTTTGCTC 3'   |
| mTnfaip3_RT_fwd2 sense:     | 5'GGAACAGGACTTTGCTACG3'      |
| mTnfaip3_RT_rev2 antisense: | 5'GATGTTGCTGAGGACAAATATG3'   |
| mTrps1_RT_fwd sense:        | 5' GCCATTCCAAAGACTTCCAG 3'   |
| mTrps1_RT_rev antisense:    | 5' AGTTTTCCGTCCAATGCC 3'     |
| mTsku_RT_fwd sense:         | 5' GCTCCCCCTTGAGTGACATC 3'   |
| mTsku_RT_rev antisense:     | 5' GGAAGCAGGCGATGGATAAG 3'   |
| mTspan18_RT_fwd2 sense:     | 5' CTTACCAAGCACTACCAAGG 3'   |
| mTspan18_RT_rev2 antisense: | 5' TCAGTGTCCAGCGTCAG 3'      |
| mWif1_RT_fwd sense:         | 5' CCACTCCATGAATTTTACCTG 3'  |
| mWif1_RT_rev antisense:     | 5' AGGGACATTGACAGTTGG 3'     |

### Chromatin immunoprecipitation primers

Reference region:

|                                 |                            |
|---------------------------------|----------------------------|
| mGapdh-ChIP-TSS-fwd sense:      | 5' GCCTGAGCTAGGACTGG 3'    |
| mGapdh-ChIP-TSS-rev2 antisense: | 5' AGGGCTGCAGTCCGTATTTA 3' |

NF-κB binding sites:

|                                  |                            |
|----------------------------------|----------------------------|
| mLhx2-ChIP-+14550-fwd2 sense:    | 5' CATCCTGATTCCCTTCTGGA 3' |
| mLhx2-ChIP-+14550-rev antisense: | 5' GGGCTGACTTTCTGCACTTT 3' |
| mSox9-ChIP-+2903-fwd2 sense:     | 5' CATTGCTGGAGGGAGAAAAG 3' |

|                                   |                              |
|-----------------------------------|------------------------------|
| mSox9-ChIP-+2903-rev2 antisense:  | 5' GCCTAGAGGTGGATGGATGA 3'   |
| mTrps1-ChIP--62449-fwd sense:     | 5' TGTTGCAGACCTAAGAAGGACA 3' |
| mTrps1-ChIP--62449-rev antisense: | 5' CAACCTCACATGCCCACTT 3'    |
| mMmp9-ChIP-+46fwd sense:          | 5' TCTTTCCTTCCCAAGGAGT 3'    |
| mMmp9-ChIP-+46rev antisense:      | 5' CCATCCCCACACTGTAGGTT 3'   |

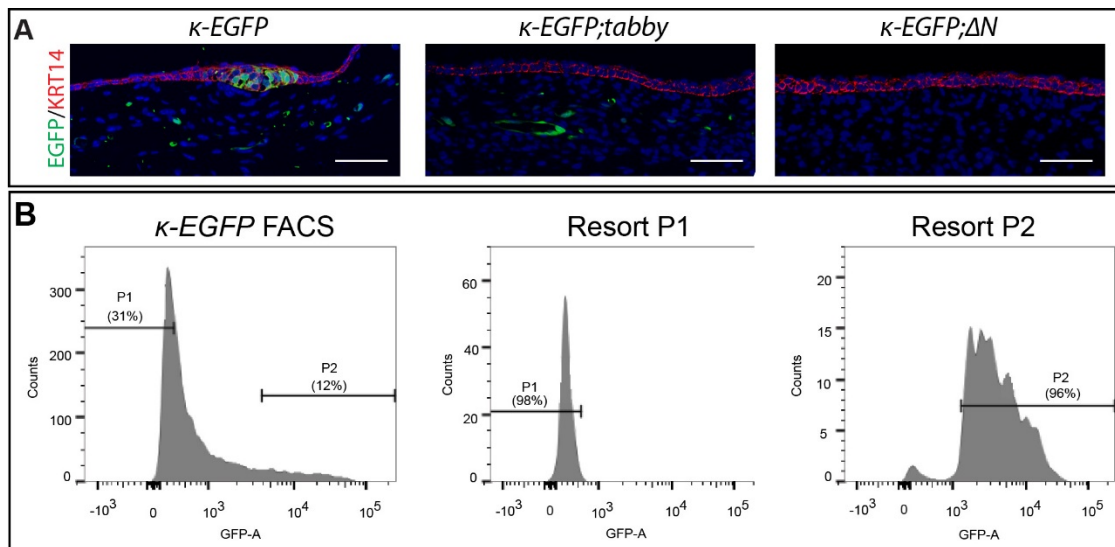

**Fig. S1. Isolation of primary placode keratinocytes using NF- $\kappa$ B-specific EGFP reporter mice ( $\kappa$ -EGFP).** (A) EGFP expression pattern in  $\kappa$ -EGFP,  $\kappa$ -EGFP;tabby and  $\kappa$ -EGFP; $\Delta N$  embryos at E14.5. (B) Enzymatically and mechanically separated epidermal keratinocytes from  $\kappa$ -EGFP embryos (n = 5) were sorted via FACS into an EGFP-positive (primary placode-specific, P2) and EGFP-negative (interfollicular keratinocytes, P1) cell population. Purity of both populations was determined over a resort, in which both populations showed a recovery rate of over 95%. Purified cell populations were used for microarray analysis, qRT-PCR and ChIP experiments.

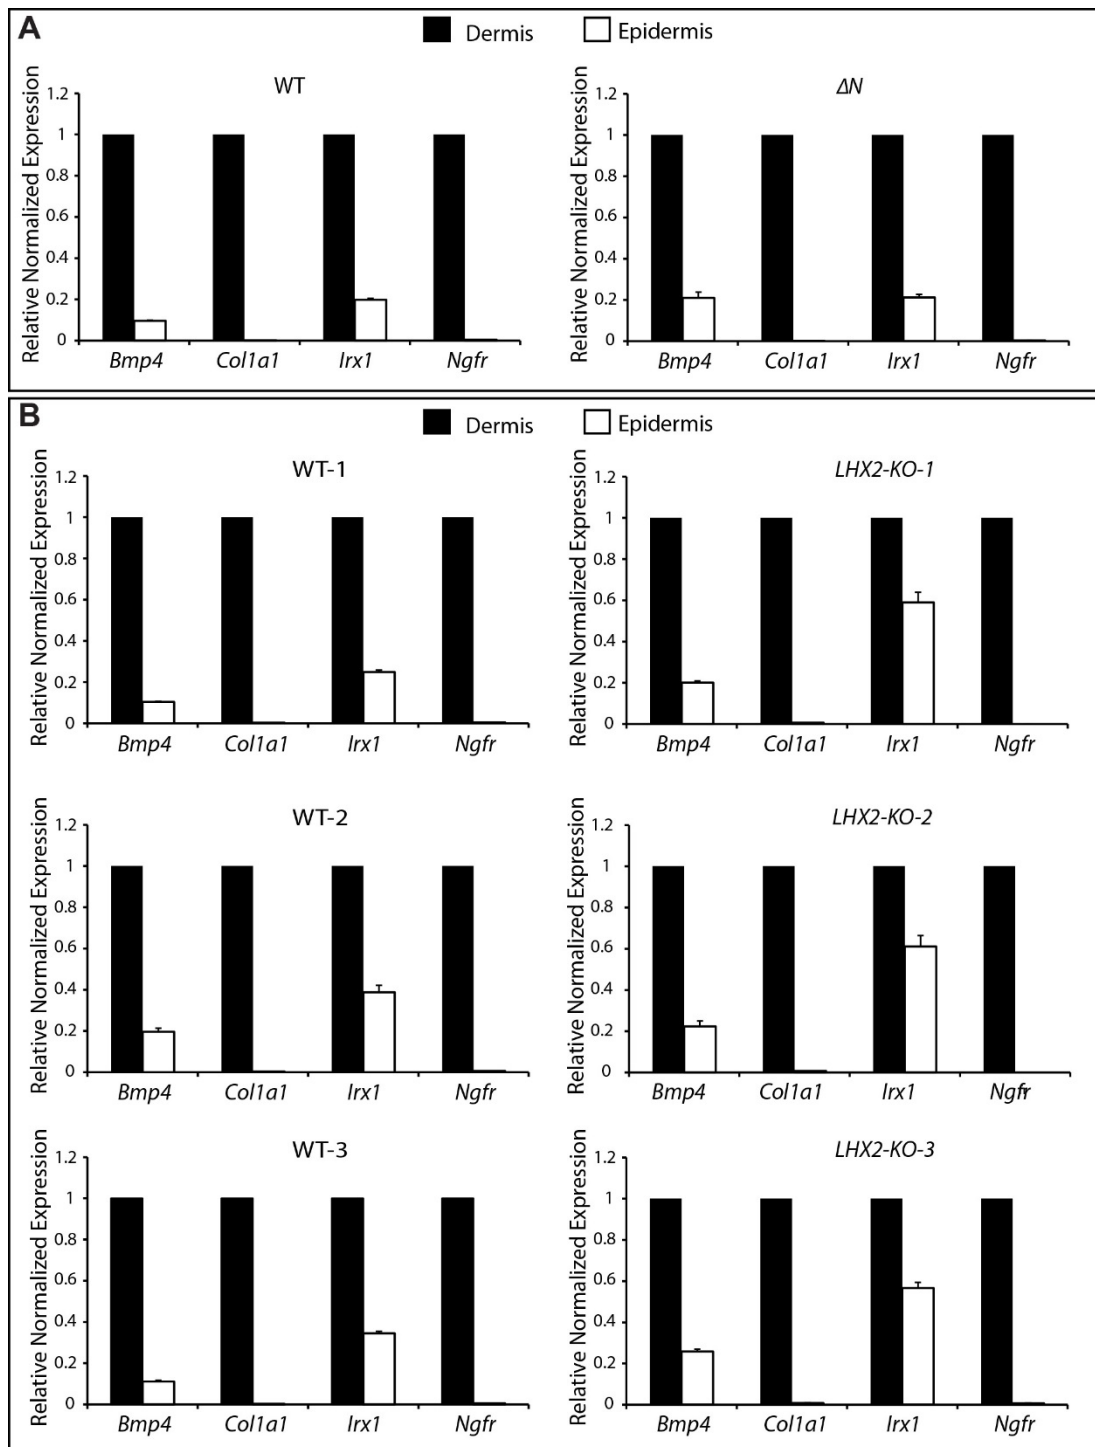

**Fig. S2. Dermal markers were absent in epidermal keratinocyte samples of  $\Delta N$ , *Lhx2*-KOs and of corresponding controls. (A,B)** Quantitative real-time PCR (qRT-PCR) analysis for *Bmp4*, *Col1a1*, *Irx1* and *Ngfr* expression using either RNA samples from epidermal keratinocytes of  $n = 3$   $\Delta N$  (A), *Lhx2*-KO (B) and corresponding control embryos at E14.5. Statistical analyses were performed using a two-tailed unpaired t-test. Data are presented as mean $\pm$ s.e.m.

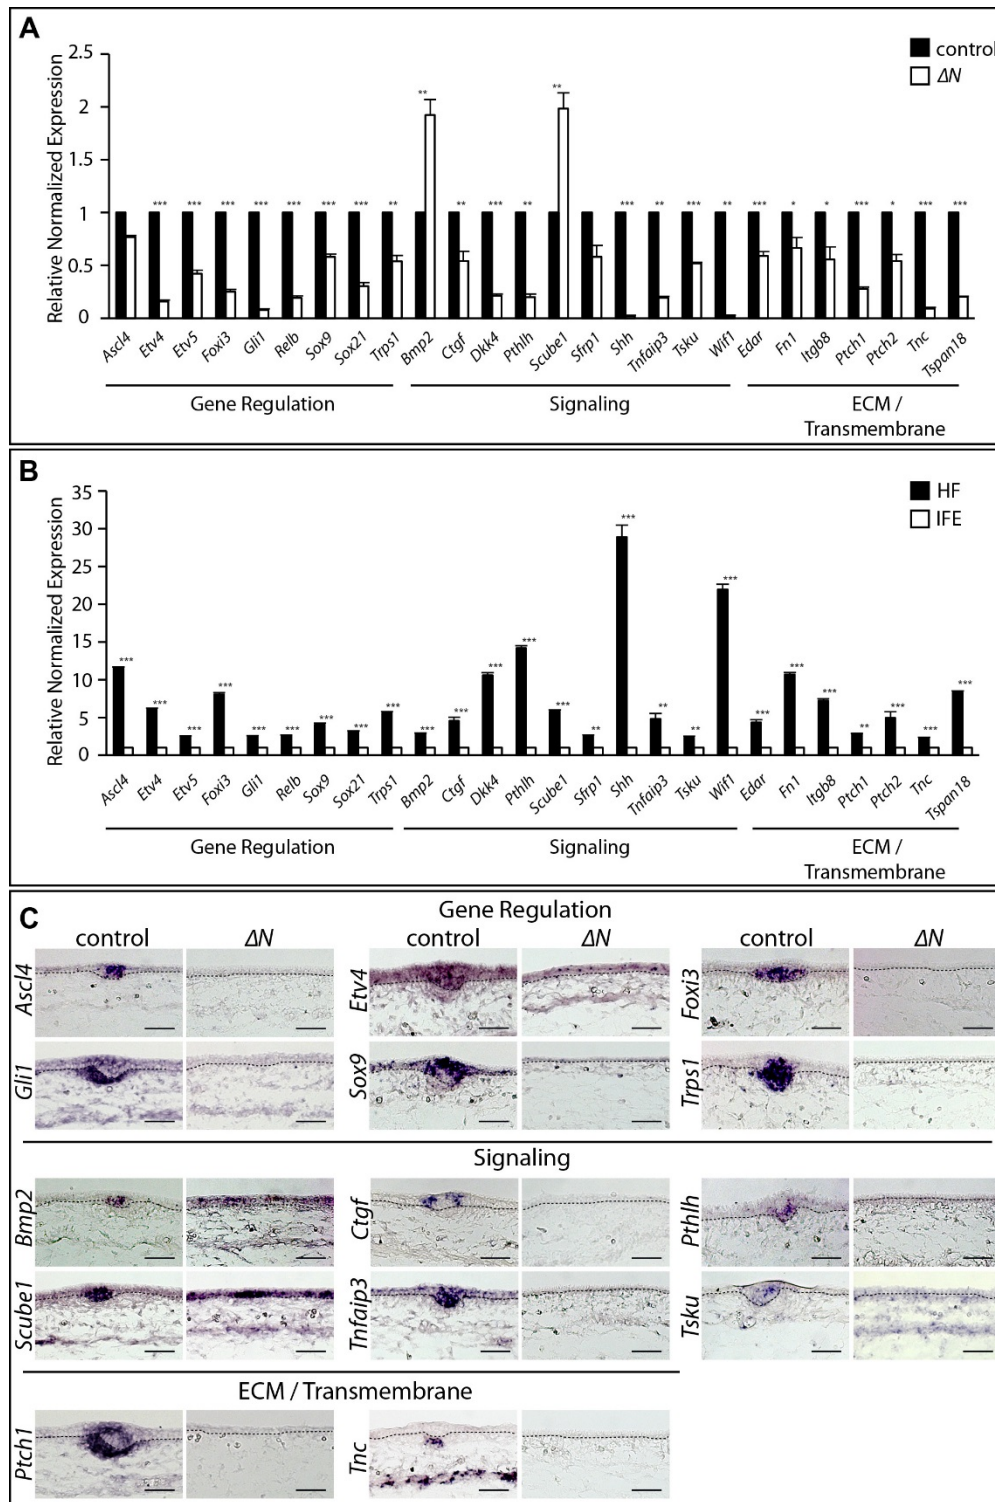

**Fig. S3. Verification of placode-specific expression and of NF- $\kappa$ B dependence of selected genes from microarray analysis. (A,B)** Quantitative real-time PCR (qRT-PCR) analysis using either RNA samples from epidermal keratinocytes of  $n = 3$  controls or  $\Delta N$  embryos (A), or RNA samples isolated from EGFP- positive (placode) or EGFP-negative (IFE) sorted keratinocytes (B) at E14.5. Statistical analyses were performed using a two-tailed unpaired t-test. Data are presented as mean $\pm$ s.e.m. \*  $P < 0.05$ ; \*\*  $P < 0.01$ ; \*\*\*  $P < 0.001$ . (C) In situ hybridization for mRNAs of NF- $\kappa$ B target genes using representative sagittal sections of  $n = 3$   $\Delta N$  and control embryos at E14.5. Dashed lines indicate boundary between epidermis and dermis. Scale bars: 50  $\mu$ m.

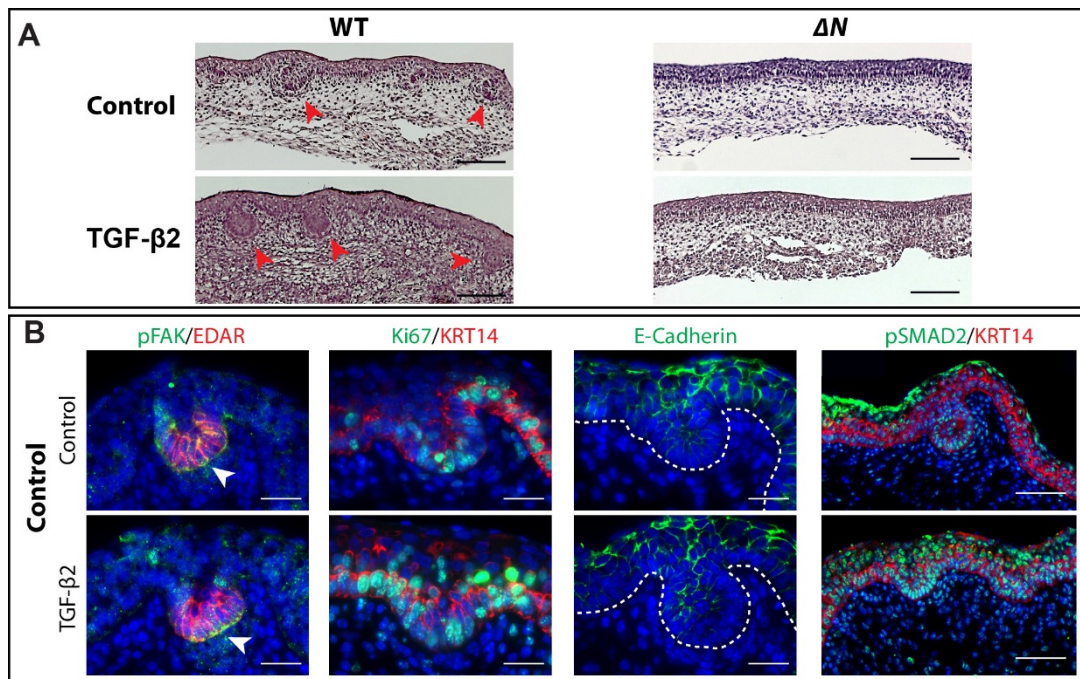

**Fig. S4. Treatment of embryonic control skin explants with recombinant TGF $\beta$ 2 slightly enhanced primary HF induction.** (A) Embryonic skin explants from  $n = 3$  E14.5 control and  $\Delta N$  embryos were either left untreated (Control) or treated with recombinant TGF $\beta$ 2 (100 ng/ml) for 24 hrs.  $n = 18$  samples of each experimental group were stained with H&E and follicles were quantified in numbers of hair follicle placodes/microscopic field in relation to the control group. Scale bars: 100 $\mu$ m. (B) Immunostaining on TGF- $\beta$ 2-stimulated embryonic control skin sections corresponding to E15.5 using antibodies against pFAK, Ki67 and E-Cadherin, as well as against EDAR and KRT14 to indicate placodes. Scale bars: 20  $\mu$ m / 50  $\mu$ m (pSMAD2). Arrowheads indicate pFAK expression in HF placodes; dashed lines delineate dermal-epidermal boundaries.

**Supplementary Table S1.** Representative lists of genes enriched in E14.5 primary hair follicle placodes (**upper list**) or in the interfollicular epidermis (IFE; **lower list**). Only mRNAs differentially regulated  $\geq 1.5x$  in **hair follicle placodes vs. IFE** are listed. Hair follicle placode keratinocytes correspond to EGFP-expressing and IFE keratinocytes to EGFP-non-expressing cells separated by FACS (see main text and Fig. S1).

**Genes enriched in primary hair follicle placodes at E14.5:**

| Genes symbol | Description                                                                | Ref_Seq      | Fold change |
|--------------|----------------------------------------------------------------------------|--------------|-------------|
| Frem1        | Fras1 related extracellular matrix protein 1                               | NM_177863    | 6.72678     |
| Dkk4         | dickkopf homolog 4 ( <i>Xenopus laevis</i> )                               | NM_145592    | 5.82304     |
| Fn1          | fibronectin 1                                                              | NM_010233    | 5.04024     |
| Ascl4        | achaete-scute complex homolog 4 ( <i>Drosophila</i> )                      | NM_001163614 | 4.84369     |
| Slc14a1      | solute carrier family 14 (urea transporter), member 1                      | NM_001171010 | 4.59977     |
| Trps1        | trichorhinophalangeal syndrome I (human)                                   | NM_032000    | 4.32476     |
| Prokr2       | prokineticin receptor 2                                                    | NM_144944    | 4.31001     |
| Foxi3        | forkhead box I3                                                            | NM_001101464 | 4.23003     |
| Nrp2         | neuropilin 2                                                               | NM_001077403 | 4.15898     |
| Wif1         | Wnt inhibitory factor 1                                                    | NM_011915    | 4.10489     |
| Tspan18      | tetraspanin 18                                                             | NM_183180    | 4.02829     |
| Socs2        | suppressor of cytokine signaling 2                                         | NM_007706    | 3.96253     |
| Ltb          | lymphotoxin B                                                              | NM_008518    | 3.72502     |
| Cd74         | CD74 antigen                                                               | NM_001042605 | 3.448       |
| Tgfb2        | transforming growth factor, beta 2                                         | NM_009367    | 3.40851     |
| Necab1       | N-terminal EF-hand calcium binding protein 1                               | NM_178617    | 3.33139     |
| Fgf20        | fibroblast growth factor 20                                                | NM_030610    | 3.29271     |
| Dusp6        | dual specificity phosphatase 6                                             | NM_026268    | 3.21706     |
| Tmem100      | transmembrane protein 100                                                  | NM_026433    | 3.17391     |
| Edar         | ectodysplasin-A receptor                                                   | NM_010100    | 3.15788     |
| Rragd        | Ras-related GTP binding D                                                  | NM_027491    | 3.11128     |
| Itgb8        | integrin beta 8                                                            | NM_177290    | 3.08216     |
| Tll1         | tolloid-like                                                               | NM_009390    | 3.07956     |
| Mical2       | microtubule associated monooxygenase, calponin and LIM domain containing 2 | NM_177282    | 3.06069     |
| Steap4       | STEAP family member 4                                                      | NM_054098    | 3.0561      |
| Adamts3      | a disintegrin-like and metallopeptidase with thrombospondin motifs 3       | NM_177872    | 2.97619     |
| Has3         | hyaluronan synthase 3                                                      | NM_008217    | 2.95032     |
| Fgd5         | FYVE, RhoGEF and PH domain containing 5                                    | NM_172731    | 2.88688     |
| Tnf          | tumor necrosis factor                                                      | NM_013693    | 2.83063     |
| Etv4         | ets variant gene 4 (E1A enhancer binding protein, E1AF)                    | NM_008815    | 2.82086     |



|            |                                                                                  |              |         |
|------------|----------------------------------------------------------------------------------|--------------|---------|
| Nkain3     | Na <sup>+</sup> /K <sup>+</sup> transporting ATPase interacting 3                | NM_172987    | 2.77675 |
| Shh        | sonic hedgehog                                                                   | NM_009170    | 2.76033 |
| Prss35     | protease, serine, 35                                                             | NM_178738    | 2.71064 |
| Ifitm1     | interferon induced transmembrane protein 1                                       | NM_026820    | 2.7034  |
| Lgr6       | leucine-rich repeat-containing G protein-coupled receptor 6                      | NM_001033409 | 2.67464 |
| Aff2       | AF4/FMR2 family, member 2                                                        | NM_008032    | 2.67125 |
| Clip3      | CAP-GLY domain containing linker protein 3                                       | NM_001081114 | 2.66474 |
| C1s        | complement component 1, s subcomponent                                           | NM_144938    | 2.63794 |
| Ncam1      | neural cell adhesion molecule 1                                                  | NM_001081445 | 2.63623 |
| Madcam1    | mucosal vascular addressin cell adhesion molecule 1                              | NM_013591    | 2.63337 |
| Cntnap1    | contactin associated protein-like 1                                              | NM_016782    | 2.62987 |
| Rasgef1b   | RasGEF domain family, member 1B                                                  | NM_145839    | 2.60963 |
| Myb        | myeloblastosis oncogene                                                          | NM_010848    | 2.59304 |
| Moxd1      | monooxygenase, DBH-like 1                                                        | NM_021509    | 2.59    |
| Tnfaip3    | tumor necrosis factor, alpha-induced protein 3                                   | NM_009397    | 2.58453 |
| Csgalnact1 | chondroitin sulfate N-acetylgalactosaminyltransferase 1                          | NM_172753    | 2.58372 |
| Mapk4      | mitogen-activated protein kinase 4                                               | NM_172632    | 2.5564  |
| Stra6      | stimulated by retinoic acid gene 6                                               | NM_009291    | 2.55396 |
| Krt17      | keratin 17                                                                       | NM_010663    | 2.55127 |
| Kcnmb4     | potassium large conductance calcium-activated channel, subfamily M beta member 4 | NM_021452    | 2.53788 |
| Mmp9       | matrix metalloproteinase 9                                                       | NM_013599    | 2.53534 |
| Srgap1     | SLIT-ROBO Rho GTPase activating protein 1                                        | NM_001081037 | 2.53366 |
| Ctgf       | connective tissue growth factor                                                  | NM_010217    | 2.50581 |
| Stxbp6     | syntaxin binding protein 6 (amisyn)                                              | NM_144552    | 2.50082 |
| Lass4      | LAG1 homolog, ceramide synthase 4                                                | NM_026058    | 2.47589 |
| Scube1     | signal peptide, CUB domain, EGF-like 1                                           | NM_022723    | 2.46246 |
| Cpe        | carboxypeptidase E                                                               | NM_013494    | 2.4328  |
| Pthlh      | parathyroid hormone-like peptide                                                 | NM_008970    | 2.42713 |
| Alox12e    | arachidonate lipoxygenase, epidermal                                             | NM_145684    | 2.42105 |
| Ptch2      | patched homolog 2                                                                | NM_008958    | 2.39458 |
| Scd1       | stearoyl-Coenzyme A desaturase 1                                                 | NM_009127    | 2.37643 |
| Dchs1      | dachsous 1 (Drosophila)                                                          | NM_001162943 | 2.33643 |
| Cyfip2     | cytoplasmic FMR1 interacting protein 2                                           | NM_133769    | 2.32122 |
| Rhpn2      | rhophilin, Rho GTPase binding protein 2                                          | NM_027897    | 2.31369 |
| Prnd       | prion protein dublet                                                             | NM_023043    | 2.3072  |
| Cxcr4      | chemokine (C-X-C motif) receptor 4                                               | NM_009911    | 2.30564 |
| Cxcl9      | chemokine (C-X-C motif) ligand 9                                                 | NM_008599    | 2.28395 |
| Setbp1     | SET binding protein 1                                                            | NM_053099    | 2.25846 |
| Lgi2       | leucine-rich repeat LGI family, member 2                                         | NM_144945    | 2.2534  |

|               |                                                                     |              |         |
|---------------|---------------------------------------------------------------------|--------------|---------|
| Sox9          | SRY-box containing gene 9                                           | NM_011448    | 2.24712 |
| Fgfr1         | fibroblast growth factor receptor 1                                 | NM_010206    | 2.2423  |
| Runx1         | runt related transcription factor 1                                 | NM_001111023 | 2.22868 |
| Fndc1         | fibronectin type III domain containing 1                            | NM_001081416 | 2.21535 |
| Eif4e3        | eukaryotic translation initiation factor 4E member 3                | NM_025829    | 2.20993 |
| Heg1          | HEG homolog 1 (zebrafish)                                           | NM_175256    | 2.1946  |
| Lhx2          | LIM homeobox protein 2                                              | NM_010710    | 2.19298 |
| Lrp4          | low density lipoprotein receptor-related protein 4                  | NM_172668    | 2.18112 |
| Ccdc85a       | coiled-coil domain containing 85A                                   | NM_181577    | 2.1585  |
| Zdhhc2        | zinc finger, DHHC domain containing 2                               | NM_178395    | 2.15626 |
| Mill1         | MHC I like leukocyte 1                                              | NM_153749    | 2.14469 |
| Micalcl       | MICAL C-terminal like                                               | AB359922     | 2.14146 |
| Pstpip2       | proline-serine-threonine phosphatase-interacting protein 2          | NM_013831    | 2.08008 |
| Il2rg         | interleukin 2 receptor, gamma chain                                 | NM_013563    | 2.06742 |
| Bnc2          | basonuclin 2                                                        | NM_172870    | 2.05488 |
| Mybpc1        | myosin binding protein C, slow-type                                 | NM_175418    | 2.04995 |
| Cabp1         | calcium binding protein 1                                           | NM_013879    | 2.0347  |
| Kcnh3         | potassium voltage-gated channel, subfamily H (eag-related) member 3 | NM_010601    | 2.03291 |
| Syt5          | synaptotagmin V                                                     | NM_016908    | 2.02779 |
| Fam13a        | family with sequence similarity 13, member A                        | NM_153574    | 1.99645 |
| Grik4         | glutamate receptor, ionotropic, kainate 4                           | NM_175481    | 1.98605 |
| 1110012J17Rik | RIKEN cDNA 1110012J17 gene                                          | NM_001114098 | 1.98034 |
| Plk3          | polo-like kinase 3 (Drosophila)                                     | NM_013807    | 1.97215 |
| Cxcl10        | chemokine (C-X-C motif) ligand 10                                   | NM_021274    | 1.96566 |
| Ptch1         | patched homolog 1                                                   | NM_008957    | 1.96207 |
| Alcam         | activated leukocyte cell adhesion molecule                          | NM_009655    | 1.93344 |
| Tgfb1         | transforming growth factor, beta 1                                  | NM_011577    | 1.92935 |
| Vldlr         | very low density lipoprotein receptor                               | NM_013703    | 1.92326 |
| Mpa2l         | macrophage activation 2 like                                        | NM_194336    | 1.92065 |
| Wnt10b        | wingless related MMTV integration site 10b                          | NM_011718    | 1.91905 |
| Trib1         | tribbles homolog 1 (Drosophila)                                     | NM_144549    | 1.91708 |
| Arhgef3       | Rho guanine nucleotide exchange factor (GEF) 3                      | NM_027871    | 1.91348 |
| H2-Ab1        | histocompatibility 2, class II antigen A, beta 1                    | NM_207105    | 1.91304 |
| C130021I20Rik | Riken cDNA C130021I20 gene                                          | AK147796     | 1.90649 |
| Mtmr10        | myotubularin related protein 10                                     | NM_172742    | 1.90315 |
| Dab1          | disabled homolog 1 (Drosophila)                                     | NM_177259    | 1.89918 |
| Wnt2b         | wingless related MMTV integration site 2b                           | NM_009520    | 1.89907 |
| Stx11         | syntaxin 11                                                         | NM_029075    | 1.89836 |
| Sv2b          | synaptic vesicle glycoprotein 2 b                                   | NM_001109753 | 1.89017 |

|               |                                                                                     |              |         |
|---------------|-------------------------------------------------------------------------------------|--------------|---------|
| Nfkbia        | nuclear factor of kappa light polypeptide gene enhancer in B-cells inhibitor alpha  | NM_010907    | 1.88282 |
| Rnf152        | ring finger protein 152                                                             | NM_178779    | 1.87965 |
| Fads2         | fatty acid desaturase 2                                                             | NM_019699    | 1.87774 |
| Gli1          | GLI-Kruppel family member GLI1                                                      | NM_010296    | 1.87315 |
| Pdzd2         | PDZ domain containing 2                                                             | NM_001081064 | 1.86608 |
| 6330403K07Rik | RIKEN cDNA 6330403K07 gene                                                          | NM_134022    | 1.85268 |
| Nr3c2         | nuclear receptor subfamily 3, groupC, member2                                       | NM_001083906 | 1.83938 |
| Krt18         | keratin 18                                                                          | NM_010664    | 1.83723 |
| Etv5          | ets variant gene 5                                                                  | NM_023794    | 1.8353  |
| Kcnh2         | potassium voltage-gated channel, subfamily H (eag-related) member 2                 | NM_013569    | 1.83401 |
| Ptgir         | prostaglandin I receptor (IP)                                                       | NM_008967    | 1.83208 |
| Sh3rf3        | SH3 domain containing ring finger 3                                                 | NM_172788    | 1.8301  |
| Ptk2b         | PTK2 protein tyrosine kinase 2 beta                                                 | NM_001162365 | 1.82897 |
| Mtap2         | microtubule-associated protein 2                                                    | NM_001039934 | 1.82823 |
| Mtmr7         | myotubularin related protein 7                                                      | NM_001040699 | 1.82822 |
| Robo2         | roundabout homolog 2 (Drosophila)                                                   | NM_175549    | 1.82721 |
| Kalrn         | kalirin, RhoGEF kinase                                                              | NM_177357    | 1.8251  |
| Bcl3          | B-cell leukemia/lymphoma 3                                                          | NM_033601    | 1.82083 |
| Tarm1         | T cell-interacting, activating receptor on myeloid cells 1                          | NM_177363    | 1.80831 |
| Rerg          | RAS-like, estrogen-regulated, growth-inhibitor                                      | NM_181988    | 1.80721 |
| Pgf           | placental growth factor                                                             | NM_008827    | 1.80406 |
| Stap1         | signal transducing adaptor family member 1                                          | NM_019992    | 1.80181 |
| Adamts15      | a disintegrin-like and metallopeptidase with thrombospondin motifs 15               | NM_001024139 | 1.78899 |
| Nnat          | neuronatin                                                                          | NM_010923    | 1.78484 |
| 3110082D06Rik | RIKEN cDNA 3110082D06 gene                                                          | NM_028474    | 1.77842 |
| Peli2         | pellino 2                                                                           | NM_033602    | 1.77669 |
| Unc5b         | unc-5 homolog B (C. elegans)                                                        | NM_029770    | 1.77391 |
| Tspan5        | tetraspanin 5                                                                       | NM_019571    | 1.77279 |
| Galnt6        | UDP-N-acetyl-alpha-D-galactosamine: polypeptide N-acetylgalactosaminyltransferase 6 | NM_001161767 | 1.7722  |
| Pion          | pigeon homolog (Drosophila)                                                         | NM_175437    | 1.76624 |
| Kcnip1        | Kv channel-interacting protein 1                                                    | NM_027398    | 1.76196 |
| Drp2          | dystrophin related protein 2                                                        | NM_010078    | 1.76107 |
| Neto1         | neuropilin (NRP) and tolloid (TLL)-like 1                                           | NM_144946    | 1.75975 |
| Serinc2       | serine incorporator 2                                                               | NM_172702    | 1.75794 |
| Bach2         | BTB and CNC homology 2                                                              | NM_001109661 | 1.75674 |
| Ptges         | prostaglandin E synthase                                                            | NM_022415    | 1.75584 |
| Tapbp         | TAP binding protein                                                                 | NM_001025313 | 1.75121 |
| Plcb2         | phospholipase C, beta 2                                                             | NM_177568    | 1.74533 |

|               |                                                                                                                  |              |         |
|---------------|------------------------------------------------------------------------------------------------------------------|--------------|---------|
| Meis1         | Meis homeobox 1                                                                                                  | NM_010789    | 1.73948 |
| Ajap1         | adherens junction associated protein 1                                                                           | NM_001099299 | 1.73929 |
| Sh3gl3        | SH3-domain GRB2-like 3                                                                                           | NM_017400    | 1.73684 |
| Sema3d        | sema domain, immunoglobulin domain (Ig), short basic domain secreted (semaphorin) 3D                             | NM_028882    | 1.73535 |
| Sox2          | SRY-box containing gene 2                                                                                        | NM_011443    | 1.7348  |
| Hhip          | Hedgehog-interacting protein                                                                                     | NM_020259    | 1.73156 |
| Hoxc6         | homeobox C6                                                                                                      | NM_010465    | 1.72724 |
| Tsku          | tsukushin                                                                                                        | NM_001168541 | 1.72657 |
| Rtn1          | reticulon 1                                                                                                      | NM_153457    | 1.72548 |
| Smox          | spermine oxidase                                                                                                 | NM_001177833 | 1.72453 |
| Pxdn          | peroxidasin homolog (Drosophila)                                                                                 | NM_181395    | 1.71855 |
| AY512949      | cDNA sequence AY512949                                                                                           | AY512949     | 1.71621 |
| Rcn3          | reticulocalbin 3, EF-hand calcium binding domain                                                                 | NM_026555    | 1.71433 |
| Rnf32         | ring finger protein 32                                                                                           | NM_021470    | 1.711   |
| Il23a         | interleukin 23, alpha subunit p19                                                                                | NM_031252    | 1.70695 |
| Cpne5         | copine V                                                                                                         | NM_153166    | 1.70401 |
| Slit3         | slit homolog 3 (Drosophila)                                                                                      | NM_011412    | 1.70263 |
| Susd4         | sushi domain containing 4                                                                                        | NM_144796    | 1.70162 |
| Atp1b1        | ATPase, Na <sup>+</sup> /K <sup>+</sup> transporting, beta 1 polypeptide                                         | NM_009721    | 1.69741 |
| Sox21         | SRY-box containing gene 21                                                                                       | NM_177753    | 1.69563 |
| Bmp2          | bone morphogenetic protein 2                                                                                     | NM_007553    | 1.69554 |
| 2010300C02Rik | RIKEN cDNA 2010300C02 gene                                                                                       | NM_028096    | 1.68928 |
| Sema4c        | sema domain, immunoglobulin domain (Ig), transmembrane domain (TM) and short cytoplasmic domain, (Semaphorin) 4C | NM_001126047 | 1.68679 |
| Cacna1h       | calcium channel, voltage-dependent, T type, alpha 1H subunit                                                     | NM_021415    | 1.68588 |
| 1110028C15Rik | RIKEN cDNA 1110028C15 gene                                                                                       | NM_001122738 | 1.68216 |
| D19Ert652e    | DNA segment, Chr 19, ERATO Doi 652, expressed                                                                    | BC107403     | 1.68043 |
| Igfbp4        | insulin-like growth factor binding protein 4                                                                     | NM_010517    | 1.68001 |
| Slco3a1       | solute carrier organic anion transporter family, member 3A1                                                      | NM_023908    | 1.67316 |
| Cntn2         | contactin 2                                                                                                      | NM_177129    | 1.66761 |
| Gm5077        | predicted gene 5077                                                                                              | NM_173864    | 1.66026 |
| Runx2         | runt related transcription factor 2                                                                              | NM_001146038 | 1.65805 |
| Clec2d        | C-type lectin domain family 2, member d                                                                          | NM_053109    | 1.65631 |
| Ptgs2         | prostaglandin-endoperoxide synthase 2                                                                            | NM_011198    | 1.65597 |
| Ehf           | ets homologous factor                                                                                            | NM_007914    | 1.65559 |
| Hr            | hairless                                                                                                         | NM_021877    | 1.65486 |
| Arl6          | ADP-ribosylation factor-like 6                                                                                   | NM_019665    | 1.6485  |

|          |                                                                                       |              |         |
|----------|---------------------------------------------------------------------------------------|--------------|---------|
| Nup210   | nucleoporin 210                                                                       | NM_018815    | 1.6388  |
| Rnf122   | ring finger protein 122                                                               | NM_175136    | 1.63805 |
| Galnt14  | UDP-N-acetyl-alpha-D-galactosamine: poly-peptide N-acetylgalactosaminyltransferase 14 | NM_027864    | 1.63479 |
| Bcar3    | breast cancer anti-estrogen resistance 3                                              | NM_013867    | 1.63365 |
| Doc2b    | double C2, beta                                                                       | NM_007873    | 1.63109 |
| Gpc2     | glypican 2 (cerebroglycan)                                                            | NM_172412    | 1.63104 |
| Mfap2    | microfibrillar-associated protein 2                                                   | NM_008546    | 1.6301  |
| Parp8    | poly (ADP-ribose) polymerase family, member 8                                         | NM_001081009 | 1.62741 |
| Csf1     | colony stimulating factor 1 (macrophage)                                              | NM_007778    | 1.62535 |
| Hpca     | hippocalcin                                                                           | NM_010471    | 1.62412 |
| Robo1    | roundabout homolog 1 (Drosophila)                                                     | NM_019413    | 1.62296 |
| Gata6    | GATA binding protein 6                                                                | NM_010258    | 1.62065 |
| Slc2a4   | solute carrier family 2 (facilitated glucose transporter) member 4                    | NM_009204    | 1.61892 |
| Tnip1    | TNFAIP3 interacting protein 1                                                         | NM_021327    | 1.61539 |
| Snai3    | snail homolog 3 (Drosophila)                                                          | NM_013914    | 1.61109 |
| Adamts17 | a disintegrin-like and metallopeptidase with thrombospondin motifs 17                 | NM_001033877 | 1.61011 |
| Slc39a2  | solute carrier family 39 (zinc transporter), member 2                                 | NM_001039676 | 1.60699 |
| Ntsr1    | neurotensin receptor 1                                                                | NM_018766    | 1.60654 |
| Ston2    | stonin 2                                                                              | NM_175367    | 1.60549 |
| Chst1    | carbohydrate (keratan sulfate Gal-6) sulfotransferase 1                               | NM_023850    | 1.60363 |
| Igfbp7   | insulin-like growth factor binding protein 7                                          | NM_001159518 | 1.60225 |
| Pdlim4   | PDZ and LIM domain 4                                                                  | NM_019417    | 1.6007  |
| Flrt1    | fibronectin leucine rich transmembrane protein 1                                      | NM_201411    | 1.6     |
| Ankrd45  | ankyrin repeat domain 45                                                              | NM_028664    | 1.59378 |
| Scn4b    | sodium channel, type IV, beta                                                         | NM_001013390 | 1.59078 |
| Ifitm3   | interferon induced transmembrane protein 3                                            | NM_025378    | 1.5882  |
| Vwa2     | von Willebrand factor A domain containing 2                                           | NM_172840    | 1.58769 |
| Zfp703   | zinc finger protein 703                                                               | NM_001101502 | 1.58643 |
| Aplp1    | amyloid beta (A4) precursor-like protein 1                                            | NM_007467    | 1.58109 |
| Pcdh20   | protocadherin 20                                                                      | NM_178685    | 1.5777  |
| Efha2    | EF-hand domain family, member A2                                                      | NM_030110    | 1.57743 |
| Ctxn1    | cortexin 1                                                                            | NM_183315    | 1.57693 |
| Pcdhb17  | protocadherin beta 17                                                                 | NM_053142    | 1.5748  |
| Sox4     | SRY-box containing gene 4                                                             | NM_009238    | 1.57435 |
| Birc3    | baculoviral IAP repeat-containing 3                                                   | NM_007464    | 1.56615 |
| Pcdhb16  | protocadherin beta 16                                                                 | NM_053141    | 1.566   |
| Gria3    | glutamate receptor, ionotropic, AMPA3 (alpha 3)                                       | NM_016886    | 1.56142 |

|               |                                                                                |                    |         |
|---------------|--------------------------------------------------------------------------------|--------------------|---------|
| Itga8         | integrin alpha 8                                                               | NM_001001309       | 1.55968 |
| Cobll1        | Cobl-like 1                                                                    | NM_177025          | 1.55902 |
| Mpped1        | metallophosphoesterase domain containing 1                                     | NM_172610          | 1.55823 |
| Tnc           | tenascin C                                                                     | NM_011607          | 1.55711 |
| Fam134b       | family with sequence similarity 134, member B                                  | NM_001034851       | 1.5547  |
| Bdnf          | brain derived neurotrophic factor                                              | NM_001048139       | 1.55203 |
| Pfn2          | profilin 2                                                                     | NM_019410          | 1.55202 |
| Ednra         | endothelin receptor type A                                                     | NM_010332          | 1.55142 |
| Ltbp1         | latent transforming growth factor beta binding protein 1                       | NM_019919          | 1.54781 |
| Orai2         | ORAI calcium release-activated calcium modulator 2                             | NM_178751          | 1.54545 |
| Prkar1b       | protein kinase, cAMP dependent regulatory, type I beta                         | NM_008923          | 1.54434 |
| Oasl2         | 2'-5' oligoadenylate synthetase-like 2                                         | NM_011854          | 1.5437  |
| Pck2          | phosphoenolpyruvate carboxykinase 2 (mitochondrial)                            | NM_028994          | 1.543   |
| Kcnj13        | potassium inwardly-rectifying channel, subfamily J, member 13                  | NM_001110227       | 1.54167 |
| Lzts1         | leucine zipper, putative tumor suppressor 1                                    | NM_199364          | 1.54108 |
| Grasp         | GRP1 (general receptor for phosphoinositides 1)-associated scaffold protein    | NM_019518          | 1.54028 |
| Abhd12b       | abhydrolase domain containing 12B                                              | ENSMUST00000095662 | 1.53875 |
| Olfr332       | olfactory receptor 332                                                         | NM_001011770       | 1.53477 |
| Olfr354       | olfactory receptor 354                                                         | NM_146939          | 1.53475 |
| Slc8a2        | solute carrier family 8 (sodium/calcium exchanger), member 2                   | NM_148946          | 1.53388 |
| H2-M2         | histocompatibility 2, M region locus 2                                         | NM_008204          | 1.53362 |
| Gpc4          | glypican 4                                                                     | NM_008150          | 1.52993 |
| Sema6a        | sema domain, transmembrane domain (TM), and cytoplasmic domain (semaphorin) 6A | NM_018744          | 1.52824 |
| Sfrp1         | secreted frizzled-related protein 1                                            | NM_013834          | 1.52721 |
| Tcerg1l       | transcription elongation regulator 1-like                                      | NM_183289          | 1.52632 |
| Prdm1         | PR domain containing 1, with ZNF domain                                        | NM_007548          | 1.52515 |
| Pak1          | p21 protein (Cdc42/Rac)-activated kinase 1                                     | NM_011035          | 1.52389 |
| 1190007F08Rik | RIKEN cDNA 1190007F08 gene                                                     | NM_001163721       | 1.5194  |
| Soat1         | sterol O-acyltransferase 1                                                     | NM_009230          | 1.51793 |
| Tgfb3         | transforming growth factor, beta 3                                             | NM_009368          | 1.51763 |
| Rnf180        | ring finger protein 180                                                        | NM_027934          | 1.51676 |
| Capsl         | calcyphosine-like                                                              | NM_029341          | 1.51458 |
| Ppp1r3c       | protein phosphatase 1, regulatory (inhibitor) subunit 3C                       | NM_016854          | 1.5111  |
| Arhgef4       | Rho guanine nucleotide exchange factor (GEF) 4                                 | NM_183019          | 1.51105 |
| Spo11         | sporulation protein, meiosis-specific, SPO11                                   | NM_012046          | 1.51063 |

|               |                                                             |              |         |
|---------------|-------------------------------------------------------------|--------------|---------|
|               | homolog                                                     |              |         |
| Chst11        | carbohydrate sulfotransferase 11                            | NM_021439    | 1.51022 |
| Myliip        | myosin regulatory light chain interacting protein           | NM_153789    | 1.50443 |
| Lrrc56        | leucine rich repeat containing 56                           | NM_001172064 | 1.50368 |
| Serpinb6b     | serine (or cysteine) peptidase inhibitor, clade B, member 6 | NM_011454    | 1.5019  |
| Myo1e         | myosin IE                                                   | NM_181072    | 1.50175 |
| Cav2          | caveolin 2                                                  | NM_016900    | 1.50146 |
| 4831426I19Rik | RIKEN cDNA 4831426I19 gene                                  | NM_001042699 | 1.50112 |
| Naaladl2      | N-acetylated alpha-linked acidic dipeptidase-like 2         | XM_910834    | 1.50034 |

### **Genes enriched in the interfollicular epidermis (IFE) at E14.5:**

| <b>Genes symbol</b> | <b>Description</b>                                                                        | <b>Ref_Seq</b> | <b>Fold change</b> |
|---------------------|-------------------------------------------------------------------------------------------|----------------|--------------------|
| Dct                 | dopachrome tautomerase                                                                    | NM_010024      | -13.3986           |
| Fabp7               | fatty acid binding protein 7, brain                                                       | NM_021272      | -11.1386           |
| Kit                 | kit oncogene                                                                              | NM_001122733   | -8.89564           |
| Ednrb               | endothelin receptor type B                                                                | NM_007904      | -8.03849           |
| Mcoln3              | mucolipin 3                                                                               | NM_134160      | -7.67076           |
| Hba-a1              | hemoglobin alpha, adult chain 1                                                           | NM_008218      | -7.59276           |
| Hba-a2              | hemoglobin alpha, adult chain 2                                                           | NM_001083955   | -7.07394           |
| Tyr                 | tyrosinase                                                                                | NM_011661      | -7.05902           |
| Si                  | silver                                                                                    | NM_021882      | -6.53347           |
| Slc45a2             | solute carrier family 45, member 2                                                        | NM_053077      | -6.52809           |
| Mitf                | microphthalmia-associated transcription factor                                            | NM_001113198   | -6.29898           |
| Hbb-b1              | hemoglobin, beta adult major chain                                                        | NM_008220      | -6.28766           |
| Slc24a5             | solute carrier family 24, member 5                                                        | NM_175034      | -6.27844           |
| Gpnmb               | glycoprotein (transmembrane) nmb                                                          | NM_053110      | -6.06478           |
| Itga4               | integrin alpha 4                                                                          | NM_010576      | -6.03604           |
| Slc7a8              | solute carrier family 7 (cationic amino acid transporter, light chain, L system) member 8 | NM_016972      | -5.91936           |
| Gjc3                | gap junction protein, gamma 3                                                             | NM_080450      | -5.91203           |
| Gabbr2              | gamma-aminobutyric acid (GABA) A receptor, subunit beta 2                                 | NM_008070      | -5.76314           |
| Cubn                | cubilin (intrinsic factor-cobalamin receptor)                                             | NM_001081084   | -5.7264            |
| Bace2               | beta-site APP-cleaving enzyme 2                                                           | NM_019517      | -5.30143           |
| Pax3                | paired box gene 3                                                                         | NM_008781      | -5.15059           |
| Zeb2                | zinc finger E-box binding homeobox 2                                                      | NM_015753      | -5.10228           |

|               |                                                                                            |              |          |
|---------------|--------------------------------------------------------------------------------------------|--------------|----------|
| Slc7a11       | solute carrier family 7 (cationic amino acid transporter, light chain, L system) member 11 | NM_011990    | -5.00851 |
| Gucy1b3       | guanylate cyclase 1, soluble, beta 3                                                       | NM_017469    | -4.68383 |
| Shc4          | SHC (Src homology 2 domain containing) family, member 4                                    | NM_199022    | -4.51824 |
| Dsc1          | desmocollin 1                                                                              | NM_013504    | -4.29284 |
| Cd97          | CD97 antigen                                                                               | NM_011925    | -4.08062 |
| Pde8a         | phosphodiesterase 8A                                                                       | NM_008803    | -4.01469 |
| Cpa3          | carboxypeptidase A3, mast cell                                                             | NM_007753    | -3.96657 |
| Ptprj         | protein tyrosine phosphatase, receptor type, J                                             | NM_008982    | -3.86641 |
| Eya1          | eyes absent 1 homolog (Drosophila)                                                         | NM_010164    | -3.82696 |
| Them5         | thioesterase superfamily member 5                                                          | NM_025416    | -3.79337 |
| Tm4sf1        | transmembrane 4 superfamily member 1                                                       | NM_008536    | -3.7218  |
| Serpib12      | serine (or cysteine) peptidase inhibitor, clade B (ovalbumin) member 12                    | NM_027971    | -3.55006 |
| Abca12        | ATP-binding cassette, sub-family A (ABC1), member 12                                       | NM_175210    | -3.54327 |
| 1700086L19Rik | RIKEN cDNA 1700086L19 gene                                                                 | NR_030733    | -3.53514 |
| Ttyh2         | tweety homolog 2 (Drosophila)                                                              | NM_053273    | -3.48151 |
| Sox10         | SRY-box containing gene 10                                                                 | NM_011437    | -3.40337 |
| Bhlhe41       | basic helix-loop-helix family, member e41                                                  | NM_024469    | -3.36134 |
| Pmp22         | peripheral myelin protein 22                                                               | NM_008885    | -3.35803 |
| Cdh19         | cadherin 19, type 2                                                                        | NM_001081386 | -3.33919 |
| Aadacl2       | arylacetamide deacetylase-like 2                                                           | NM_001128091 | -3.31869 |
| Megf10        | multiple EGF-like-domains 10                                                               | NM_001001979 | -3.285   |
| 4833423E24Rik | RIKEN cDNA 4833423E24 gene                                                                 | NM_001081664 | -3.28403 |
| Ddah1         | dimethylarginine dimethylaminohydrolase 1                                                  | NM_026993    | -3.27234 |
| Serpib3a      | serine (or cysteine) peptidase inhibitor, clade B (ovalbumin) member 3                     | NM_009126    | -3.19283 |
| Elovl4        | elongation of very long chain fatty acids (FEN1/Elo2, SUR4/Elo3, Yeast)-Like 4             | NM_148941    | -3.17368 |
| Iqgap2        | IQ motif containing GTPase activating protein 2                                            | NM_027711    | -3.1546  |
| Krt77         | keratin 77                                                                                 | NM_001003667 | -3.07428 |
| Ace2          | angiotensin I converting enzyme (peptidyl-dipeptidase A) 2                                 | NM_027286    | -3.06103 |
| Serpib3c      | serine (or cysteine) peptidase inhibitor, clade B, member 3                                | NM_201363    | -2.99416 |
| Mlana         | melan-A                                                                                    | NM_029993    | -2.96325 |
| Npy           | neuropeptide Y                                                                             | NM_023456    | -2.94426 |
| Aff3          | AF4/FMR2 family, member 3                                                                  | NM_010678    | -2.91408 |
| Dbpht2        | DNA binding protein with his-thr domain                                                    | NM_198866    | -2.88289 |
| Casp14        | caspase 14                                                                                 | NM_009809    | -2.86772 |
| Plp1          | Nproteolipid protein (myelin) 1                                                            | NM_011123    | -2.85823 |
| Rdh12         | retinol dehydrogenase 12                                                                   | NM_030017    | -2.85649 |



|         |                                                            |              |          |
|---------|------------------------------------------------------------|--------------|----------|
| Cdh2    | cadherin 2                                                 | NM_007664    | -2.84678 |
| Foxd3   | forkhead box D3                                            | NM_010425    | -2.80057 |
| Ptgds   | prostaglandin D2 synthase (brain)                          | NM_008963    | -2.7837  |
| Fap     | fibroblast activation protein                              | NM_007986    | -2.78074 |
| Krtdap  | keratinocyte differentiation associated protein            | NM_001033131 | -2.73273 |
| Sdr16c6 | short chain dehydrogenase/reductase family 16C, member 6   | NM_001080710 | -2.693   |
| Car8    | carbonic anhydrase 8                                       | NM_007592    | -2.68262 |
| Cttnbp2 | cortactin binding protein 2                                | NM_080285    | -2.6631  |
| Bpil2   | bactericidal/permeability-increasing protein-like 2        | NM_177772    | -2.65552 |
| Dmkn    | dermokine                                                  | NM_001166173 | -2.65336 |
| Gabbr3  | gamma-aminobutyric acid (GABA) A receptor, subunit beta 3  | NM_008071    | -2.62234 |
| Muc15   | mucin 15                                                   | NM_172979    | -2.61603 |
| Glcci1  | glucocorticoid induced transcript 1                        | NM_133236    | -2.59503 |
| Dock5   | dedicator of cytokinesis 5                                 | NM_177780    | -2.56376 |
| Tgm3    | transglutaminase 3, E polypeptide                          | NM_009374    | -2.56111 |
| Vim     | vimentin                                                   | NM_011701    | -2.55643 |
| Ets1    | E26 avian leukemia oncogene 1, 5' domain                   | NM_011808    | -2.54204 |
| Lix1l   | Lix1-like                                                  | NM_001163170 | -2.53879 |
| Smpdl3a | sphingomyelin phosphodiesterase, acid-like 3A              | NM_020561    | -2.53731 |
| Glrb    | glycine receptor, beta subunit                             | NM_010298    | -2.53534 |
| Pnpla1  | patatin-like phospholipase domain containing 1             | NM_001034885 | -2.52928 |
| Rhoj    | ras homolog gene family, member J                          | NM_023275    | -2.52197 |
| Lmo2    | LIM domain only 2                                          | NM_008505    | -2.51665 |
| Gpr124  | G protein-coupled receptor 124                             | NM_054044    | -2.51493 |
| Eng     | endoglin                                                   | NM_001146350 | -2.51234 |
| Cyp4f39 | cytochrome P450, family 4, subfamily f, polypeptide 39     | NM_177307    | -2.47551 |
| Hspb1   | heat shock protein 1                                       | NM_013560    | -2.46524 |
| Dsg1a   | desmoglein 1 alpha                                         | NM_010079    | -2.4552  |
| Gabra1  | gamma-aminobutyric acid (GABA) A receptor, subunit alpha 1 | NM_010250    | -2.44598 |
| Rassf2  | Ras association (RalGDS/AF-6) domain family member 2       | NM_175445    | -2.40868 |
| Fndc3c1 | fibronectin type III domain containing 3C1                 | NM_001007580 | -2.39585 |
| Mef2c   | myocyte enhancer factor 2C                                 | NM_001170537 | -2.39039 |
| Pla2g2f | phospholipase A2, group IIF                                | NM_012045    | -2.37833 |
| Krt1    | keratin 1                                                  | NM_008473    | -2.37567 |
| Cyp2j6  | cytochrome P450, family 2, subfamily j, polypeptide 6      | NM_010008    | -2.36934 |
| Gpm6a   | glycoprotein m6a                                           | NM_153581    | -2.36615 |

|               |                                                                        |              |          |
|---------------|------------------------------------------------------------------------|--------------|----------|
| Cd44          | CD44 antigen                                                           | NM_009851    | -2.36345 |
| 2610528A11Rik | RIKEN cDNA 2610528A11 gene                                             | BC049685     | -2.35047 |
| Serpinb3b     | serine (or cysteine) peptidase inhibitor, clade B (ovalbumin) member 3 | NM_198680    | -2.34213 |
| Ly6g6c        | lymphocyte antigen 6 complex, locus G6C                                | NM_023463    | -2.33239 |
| Syt4          | synaptotagmin IV                                                       | NM_009308    | -2.32023 |
| Aox4          | aldehyde oxidase 4                                                     | NM_023631    | -2.29538 |
| Dusp4         | dual specificity phosphatase 4                                         | NM_176933    | -2.28567 |
| Cyp2w1        | cytochrome P450, family 2, subfamily w, polypeptide 1                  | NM_001160265 | -2.28215 |
| Tspan10       | tetraspanin 10                                                         | NM_145363    | -2.2754  |
| Gpr111        | G protein-coupled receptor 111                                         | NM_001033493 | -2.24943 |
| Lgals9        | lectin, galactose binding, soluble 9                                   | NM_010708    | -2.24754 |
| Krt10         | keratin 10                                                             | NM_010660    | -2.24585 |
| Acsl1         | acyl-CoA synthetase long-chain family member 1                         | NM_007981    | -2.24443 |
| C130079G13Rik | RIKEN cDNA C130079G13 gene                                             | NM_177661    | -2.2349  |
| Sdr16c5       | short chain dehydrogenase/reductase family 16C, member 5               | NM_181989    | -2.23471 |
| Dgat2         | diacylglycerol O-acyltransferase 2                                     | NM_026384    | -2.22619 |
| Tspan7        | tetraspanin 7                                                          | NM_019634    | -2.22509 |
| Ceacam1       | carcinoembryonic antigen-related cell adhesion molecule 1              | NM_001039185 | -2.21668 |
| Plxna4        | plexin A4                                                              | NM_175750    | -2.21437 |
| Mgst1         | microsomal glutathione S-transferase 1                                 | NM_019946    | -2.21317 |
| Tmem45a       | transmembrane protein 45a                                              | NM_019631    | -2.21307 |
| Ephx3         | epoxide hydrolase 3                                                    | NM_001033163 | -2.20599 |
| Igf1          | insulin-like growth factor 1                                           | NM_010512    | -2.19222 |
| Nkd2          | naked cuticle 2 homolog (Drosophila)                                   | NM_028186    | -2.18762 |
| Gpr155        | G protein-coupled receptor 155                                         | NM_001080707 | -2.17668 |
| Mgl1          | monoglyceride lipase                                                   | NM_001166251 | -2.1652  |
| Loxl3         | lysyl oxidase-like 3                                                   | NM_013586    | -2.16268 |
| Lgals3        | lectin, galactose binding, soluble 3                                   | NM_001145953 | -2.15513 |
| Dhrs7         | dehydrogenase/reductase (SDR family) member 7                          | NM_025522    | -2.14505 |
| Defb1         | defensin beta 1                                                        | NM_007843    | -2.13563 |
| Igsf11        | immunoglobulin superfamily, member 11                                  | NM_170599    | -2.13439 |
| Apod          | apolipoprotein D                                                       | NM_007470    | -2.12285 |
| Ano7          | anoctamin 7                                                            | NM_207031    | -2.11815 |
| Msn           | moesin                                                                 | NM_010833    | -2.11068 |
| Gsta1         | glutathione S-transferase, alpha 1 (Ya)                                | NM_008181    | -2.10006 |
| Alx1          | ALX homeobox 1                                                         | NM_172553    | -2.07513 |
| Qpct          | glutaminyl-peptide cyclotransferase (glutaminyl cyclase)               | NM_027455    | -2.05609 |

|          |                                                                   |              |          |
|----------|-------------------------------------------------------------------|--------------|----------|
| Pcsk2    | proprotein convertase subtilisin/kexin type 2                     | NM_008792    | -2.04744 |
| Lox      | lysyl oxidase                                                     | NM_010728    | -2.04368 |
| Tgm1     | transglutaminase 1, K polypeptide                                 | NM_001161715 | -2.01038 |
| Rxrg     | retinoid X receptor gamma                                         | NM_009107    | -2.00772 |
| Itga9    | integrin alpha 9                                                  | NM_133721    | -2.00334 |
| Fam174b  | family with sequence similarity 174, member B                     | NM_001162532 | -1.99666 |
| Trf      | transferrin                                                       | NM_133977    | -1.99192 |
| St8sia6  | ST8 alpha-N-acetyl-neuraminide alpha-2,8-sialyltransferase 6      | NM_145838    | -1.99135 |
| Tmem26   | transmembrane protein 26                                          | NM_177794    | -1.99127 |
| Dpysl3   | dihydropyrimidinase-like 3                                        | NM_009468    | -1.98497 |
| Myo7a    | myosin VIIA                                                       | NM_008663    | -1.98315 |
| Chsy3    | chondroitin sulfate synthase 3                                    | NM_001081328 | -1.98098 |
| Dsg1b    | desmoglein 1 beta                                                 | NM_181682    | -1.97908 |
| Hsd17b11 | hydroxysteroid (17-beta) dehydrogenase 11                         | NM_053262    | -1.97763 |
| Npbwr1   | neuropeptides B/W receptor 1                                      | NM_010342    | -1.9776  |
| Clvs1    | clavesin 1                                                        | NM_028940    | -1.97621 |
| Gca      | grancalcin                                                        | NM_145523    | -1.97335 |
| Mocos    | molybdenum cofactor sulfurase                                     | NM_026779    | -1.9684  |
| Gm10639  | predicted gene 10639                                              | NM_001122660 | -1.96733 |
| Mme      | membrane metallo endopeptidase                                    | NM_008604    | -1.95696 |
| Fmn1     | formin 1                                                          | NM_010230    | -1.95256 |
| Gsta2    | glutathione S-transferase, alpha 2 (Yc2)                          | NM_008182    | -1.93678 |
| Nipal1   | NIPA-like domain containing 1                                     | NM_001081205 | -1.93147 |
| Rab25    | RAB25, member RAS oncogene family                                 | NM_016899    | -1.93048 |
| Gldc     | glycine decarboxylase                                             | NM_138595    | -1.92331 |
| F3       | coagulation factor III                                            | NM_010171    | -1.92279 |
| Pde3a    | phosphodiesterase 3A, cGMP inhibited                              | NM_018779    | -1.92154 |
| Slc6a15  | solute carrier family 6 (neurotransmitter transporter), member 15 | NM_175328    | -1.92055 |
| Scel     | sciellin                                                          | NM_022886    | -1.91843 |
| Atg4a    | autophagy-related 4A (yeast)                                      | NM_174875    | -1.91751 |
| Nipal4   | NIPA-like domain containing 4                                     | NM_172524    | -1.89996 |
| St3gal5  | ST3 beta-galactoside alpha-2,3-sialyltransferase 5                | NM_011375    | -1.89425 |
| Tprg     | transformation related protein 63 regulated                       | NM_175165    | -1.89031 |
| Plxnc1   | plexin C1                                                         | NM_018797    | -1.88757 |
| Pcsk6    | proprotein convertase subtilisin/kexin type 6                     | NM_011048    | -1.88695 |
| Vat1l    | vesicle amine transport protein 1 homolog-like                    | NM_173016    | -1.88139 |
| Phyhipl  | phytanoyl-CoA hydroxylase interacting protein-like                | NM_178621    | -1.88025 |
| Hexa     | hexosaminidase A                                                  | NM_010421    | -1.87951 |
| Fam13c   | family with sequence similarity 13, member C                      | NM_024244    | -1.87934 |

|               |                                                                                                     |              |          |
|---------------|-----------------------------------------------------------------------------------------------------|--------------|----------|
| Acadl         | acyl-Coenzyme A dehydrogenase, long-chain                                                           | NM_007381    | -1.87602 |
| Parvb         | parvin, beta                                                                                        | NM_133167    | -1.86923 |
| Gabrp         | gamma-aminobutyric acid (GABA) A receptor, pi                                                       | NM_146017    | -1.86752 |
| Smtnl2        | smoothelin-like 2                                                                                   | NM_177776    | -1.86721 |
| Cpa6          | carboxypeptidase A6                                                                                 | NM_177834    | -1.8646  |
| Lipm          | lipase, family member M                                                                             | NM_023903    | -1.86238 |
| Dpp4          | dipeptidylpeptidase 4                                                                               | NM_010074    | -1.86079 |
| Anxa1         | annexin A1                                                                                          | NM_010730    | -1.86048 |
| Afap1l2       | actin filament associated protein 1-like 2                                                          | NM_146102    | -1.85728 |
| Heyl          | hairly/enhancer-of-split related with YRPW motif-like                                               | NM_013905    | -1.85722 |
| Zfp185        | zinc finger protein 185                                                                             | NM_009549    | -1.85238 |
| Atg4a         | autophagy-related 4A (yeast)                                                                        | NM_174875    | -1.85005 |
| Ch25h         | cholesterol 25-hydroxylase                                                                          | NM_009890    | -1.85    |
| 4931406C07Rik | RIKEN cDNA 4931406C07 gene                                                                          | NM_133732    | -1.848   |
| Slc2a3        | solute carrier family 2 (facilitated glucose transporter) member 3                                  | NM_011401    | -1.84559 |
| Col12a1       | collagen, type XII, alpha 1                                                                         | NM_007730    | -1.8431  |
| Sgip1         | SH3-domain GRB2-like (endophilin) interacting protein 1                                             | NM_144906    | -1.84309 |
| Adam12        | a disintegrin and metallopeptidase domain 12 (meltrin alpha)                                        | NM_007400    | -1.84139 |
| Gulp1         | GULP, engulfment adaptor PTB domain containing 1                                                    | NM_028450    | -1.84102 |
| Fam57a        | family with sequence similarity 57, member A                                                        | NM_027773    | -1.8401  |
| Ccr4          | chemokine (C-C motif) receptor 4                                                                    | NM_009916    | -1.83905 |
| Plagl1        | pleiomorphic adenoma gene-like 1                                                                    | NM_009538    | -1.83139 |
| Tmem154       | transmembrane protein 154                                                                           | NM_177260    | -1.83136 |
| St3gal1       | ST3 beta-galactoside alpha-2,3-sialyltransferase 1                                                  | NM_009177    | -1.82318 |
| Crmp1         | collapsin response mediator protein 1                                                               | NM_007765    | -1.81883 |
| Il22ra1       | interleukin 22 receptor, alpha 1                                                                    | NM_178257    | -1.81498 |
| Cftr          | cystic fibrosis transmembrane conductance regulator homolog                                         | NM_021050    | -1.81473 |
| Ctsc          | cathepsin C                                                                                         | NM_009982    | -1.81255 |
| Tnik          | TRAF2 and NCK interacting kinase                                                                    | NM_026910    | -1.8114  |
| Sbsn          | suprabasin                                                                                          | NM_172205    | -1.81113 |
| Chl1          | cell adhesion molecule with homology to L1CAM                                                       | NM_007697    | -1.80492 |
| Uap1l1        | UDP-N-acetylglucosamine pyrophosphorylase 1-like 1                                                  | NM_001033293 | -1.79965 |
| Pcbd1         | pterin 4 alpha carbinolamine dehydratase/dimerization cofactor of Hepatocyte Nuclear Factor 1 Alpha | NM_025273    | -1.79887 |

|               |                                                                                              |              |          |
|---------------|----------------------------------------------------------------------------------------------|--------------|----------|
| Pde3b         | phosphodiesterase 3B, cGMP-inhibited                                                         | NM_011055    | -1.79598 |
| Arhgap6       | Rho GTPase activating protein 6                                                              | NM_009707    | -1.79047 |
| Ceacam19      | carcinoembryonic antigen-related cell adhesion molecule 19                                   | NM_177036    | -1.78945 |
| Adamts1       | a disintegrin-like and metallopeptidase repro-lysin type with Thrombospondin Type 1 Motif, 1 | NM_009621    | -1.78818 |
| Rab31         | RAB31, member RAS oncogene family                                                            | NM_133685    | -1.78794 |
| Nppb          | natriuretic peptide precursor type B                                                         | NM_008726    | -1.78734 |
| Cdh9          | cadherin 9                                                                                   | NM_009869    | -1.78631 |
| Adssl1        | adenylosuccinate synthetase like 1                                                           | NM_007421    | -1.78417 |
| Edn1          | endothelin 1                                                                                 | NM_010104    | -1.78375 |
| Lypd3         | Ly6/Plaur domain containing 3                                                                | NM_133743    | -1.78152 |
| Capns2        | calpain, small subunit 2                                                                     | NM_027112    | -1.78084 |
| 2310007B03Rik | RIKEN cDNA 2310007B03 gene                                                                   | NM_172411    | -1.77783 |
| Anxa8         | annexin A8                                                                                   | NM_013473    | -1.77481 |
| Ppp1r16b      | protein phosphatase 1, regulatory (inhibitor) subunit 16                                     | NM_153089    | -1.76265 |
| Rin3          | Ras and Rab interactor 3                                                                     | NM_177620    | -1.7594  |
| Aim1          | absent in melanoma 1                                                                         | NM_172393    | -1.75903 |
| Gm5226        | predicted pseudogene 5226                                                                    | XM_914955    | -1.75671 |
| Ogn           | osteoglycin                                                                                  | NM_008760    | -1.75611 |
| Manba         | mannosidase, beta A, lysosomal                                                               | NM_027288    | -1.75238 |
| 2210023G05Rik | RIKEN cDNA 2210023G05 gene                                                                   | NM_197999    | -1.7485  |
| Slc26a7       | solute carrier family 26, member 7                                                           | NM_145947    | -1.7447  |
| Cd200         | CD200 antigen                                                                                | NM_010818    | -1.744   |
| Rab3d         | RAB3D, member RAS oncogene family                                                            | NM_031874    | -1.7392  |
| Leprel1       | leprecan-like 1                                                                              | NM_173379    | -1.73852 |
| AW551984      | expressed sequence AW551984                                                                  | NM_178737    | -1.7381  |
| C2            | complement component 2 (within H-2S)                                                         | NM_013484    | -1.73393 |
| Scnn1a        | sodium channel, nonvoltage-gated 1 alpha                                                     | NM_011324    | -1.73157 |
| Il15          | interleukin 15                                                                               | NM_008357    | -1.73129 |
| Sirpa         | signal-regulatory protein alpha                                                              | NM_007547    | -1.72769 |
| Dlx5          | distal-less homeobox 5                                                                       | NM_010056    | -1.727   |
| Hist1h2bc     | histone cluster 1, H2bc                                                                      | NM_023422    | -1.72637 |
| Nkain4        | Na <sup>+</sup> /K <sup>+</sup> transporting ATPase interacting 4                            | NM_021426    | -1.72516 |
| Dlc1          | deleted in liver cancer 1                                                                    | NM_015802    | -1.71766 |
| Alox12        | arachidonate 12-lipoxygenase                                                                 | NM_007440    | -1.71714 |
| Syng1         | synaptogyrin 1                                                                               | NM_207708    | -1.71617 |
| Ptprm         | protein tyrosine phosphatase, receptor type, M                                               | NM_008984    | -1.71509 |
| Cd109         | CD109 antigen                                                                                | NM_153098    | -1.70606 |
| Cpt1a         | carnitine palmitoyltransferase 1a, liver                                                     | NM_013495    | -1.70545 |
| Igfbp3        | insulin-like growth factor binding protein 3                                                 | NM_008343    | -1.70523 |
| Edil3         | EGF-like repeats and discoidin I-like domains 3                                              | NM_001037987 | -1.7045  |

|          |                                                                          |              |          |
|----------|--------------------------------------------------------------------------|--------------|----------|
| Prex1    | phosphatidylinositol-3,4,5-trisphosphate-dependent Rac exchange factor 1 | NM_177782    | -1.70439 |
| Aebp1    | AE binding protein 1                                                     | NM_009636    | -1.70392 |
| Foxo1    | forkhead box O1                                                          | NM_019739    | -1.70091 |
| Syde1    | synapse defective 1, Rho GTPase, homolog 1 (C. elegans)                  | NM_027875    | -1.69704 |
| Ica1     | islet cell autoantigen 1                                                 | NM_010492    | -1.69649 |
| Faah     | fatty acid amide hydrolase                                               | NM_010173    | -1.69601 |
| Gsta3    | glutathione S-transferase, alpha 3                                       | NM_001077353 | -1.69572 |
| Renbp    | renin binding protein                                                    | NM_023132    | -1.69342 |
| Gpr143   | G protein-coupled receptor 143                                           | NM_010951    | -1.6893  |
| Rab27b   | RAB27b, member RAS oncogene family                                       | NM_001082553 | -1.68653 |
| Cot1l    | coactosin-like 1 (Dictyostelium)                                         | NM_028071    | -1.68495 |
| Gpr115   | G protein-coupled receptor 115                                           | NM_030067    | -1.68479 |
| Pla2g4f  | phospholipase A2, group IVF                                              | NM_001024145 | -1.6837  |
| Creg1    | cellular repressor of E1A-stimulated genes 1                             | NM_011804    | -1.68105 |
| Atp6v0a1 | ATPase, H+ transporting, lysosomal V0 subunit A1                         | NM_016920    | -1.68015 |
| Fbn2     | fibrillin 2                                                              | NM_010181    | -1.67988 |
| Cdkn1a   | cyclin-dependent kinase inhibitor 1A (P21)                               | NM_007669    | -1.67904 |
| Abtb2    | ankyrin repeat and BTB (POZ) domain containing 2                         | NM_178890    | -1.67736 |
| Vat1     | vesicle amine transport protein 1 homolog (T californica)                | NM_012037    | -1.67695 |
| Agtr1a   | angiotensin II receptor, type 1a                                         | NM_177322    | -1.67621 |
| Rarb     | retinoic acid receptor, beta                                             | NM_011243    | -1.67254 |
| Tmbim1   | transmembrane BAX inhibitor motif containing 1                           | NM_027154    | -1.66823 |
| Myo5b    | myosin VB                                                                | NM_201600    | -1.6682  |
| Sdc3     | syndecan 3                                                               | NM_011520    | -1.66804 |
| Fam83a   | family with sequence similarity 83, member A                             | NM_173862    | -1.66613 |
| Aldh1a7  | aldehyde dehydrogenase family 1, subfamily A7                            | NM_011921    | -1.65783 |
| Npl      | N-acetylneuraminase pyruvate lyase                                       | NM_028749    | -1.65692 |
| Nkd1     | naked cuticle 1 homolog (Drosophila)                                     | NM_027280    | -1.65403 |
| Mall     | mal, T-cell differentiation protein-like                                 | NM_145532    | -1.65312 |
| Reln     | reelin                                                                   | NM_011261    | -1.65289 |
| Rhob     | ras homolog gene family, member B                                        | NM_007483    | -1.6515  |
| Gm2a     | GM2 ganglioside activator protein                                        | NM_010299    | -1.64723 |
| Plbd1    | phospholipase B domain containing 1                                      | NM_025806    | -1.64712 |
| Gm6181   | predicted pseudogene 6181                                                | XM_885168    | -1.64469 |
| Prkg2    | protein kinase, cGMP-dependent, type II                                  | NM_008926    | -1.64465 |
| Fez1     | fasciculation and elongation protein zeta 1 (zygin I)                    | NM_183171    | -1.64201 |
| Ppfibp2  | PTPRF interacting protein, binding protein 2                             | NM_008905    | -1.64072 |

|               | (liprin beta 2)                                                     |                    |          |
|---------------|---------------------------------------------------------------------|--------------------|----------|
| Masp1         | mannan-binding lectin serine peptidase 1                            | NM_008555          | -1.64019 |
| Palld         | palladin, cytoskeletal associated protein                           | NM_001081390       | -1.63705 |
| Liph          | lipase, member H                                                    | NM_001083894       | -1.6357  |
| B4galt5       | UDP-Gal:betaGlcNAc beta 1,4-galactosyltransferase, polypeptide 5    | NM_019835          | -1.63195 |
| Id2           | inhibitor of DNA binding 2                                          | NM_010496          | -1.63144 |
| Mxra7         | matrix-remodelling associated 7                                     | NM_026280          | -1.63076 |
| Ap1s2         | adaptor-related protein complex 1, sigma 2 subunit                  | NM_026887          | -1.62928 |
| Slc27a6       | solute carrier family 27 (fatty acid transporter), member 6         | NM_001081072       | -1.62671 |
| Gfra1         | glial cell line derived neurotrophic factor family receptor alpha 1 | NM_010279          | -1.62607 |
| Serpib7       | serine (or cysteine) peptidase inhibitor, clade B, member 7         | NM_027548          | -1.62578 |
| 4930485B16Rik | RIKEN cDNA 4930485B16 gene                                          | ENSMUST00000067705 | -1.62514 |
| Npr2          | natriuretic peptide receptor 2                                      | NM_173788          | -1.62372 |
| Fads3         | fatty acid desaturase 3                                             | NM_021890          | -1.62337 |
| Ankrd22       | ankyrin repeat domain 22                                            | NM_024204          | -1.62334 |
| Bend6         | BEN domain containing 6                                             | NM_177235          | -1.6224  |
| Cpeb4         | cytoplasmic polyadenylation element binding protein 4               | NM_026252          | -1.62213 |
| Nipal2        | NIPA-like domain containing 2                                       | NM_145469          | -1.62162 |
| Cpne4         | copine IV                                                           | NM_028719          | -1.62158 |
| Serpina3b     | serine (or cysteine) peptidase inhibitor, clade A, member 3         | NM_173024          | -1.62112 |
| 1700055N04Rik | RIKEN cDNA 1700055N04 gene                                          | AK081788           | -1.62076 |
| Gm10786       | predicted gene 10786                                                | ENSMUST00000099550 | -1.61909 |
| Ppl           | periplakin                                                          | NM_008909          | -1.61745 |
| Lta4h         | leukotriene A4 hydrolase                                            | NM_008517          | -1.61696 |
| Lpcat2        | lysophosphatidylcholine acyltransferase 2                           | NM_173014          | -1.61627 |
| Tmem108       | transmembrane protein 108                                           | NM_178638          | -1.61446 |
| Ttc22         | tetratricopeptide repeat domain 22                                  | NM_177667          | -1.6136  |
| Fmod          | fibromodulin                                                        | NM_021355          | -1.6126  |
| Sat1          | spermidine/spermine N1-acetyl transferase 1                         | NM_009121          | -1.61253 |
| Lipk          | lipase, family member K                                             | NM_172837          | -1.61147 |
| Shc3          | src homology 2 domain-containing transforming protein C3            | NM_009167          | -1.60699 |
| Ahr           | aryl-hydrocarbon receptor                                           | NM_013464          | -1.60638 |
| Gucy1a3       | guanylate cyclase 1, soluble, alpha 3                               | NM_021896          | -1.60579 |
| Dsg3          | desmoglein 3                                                        | NM_030596          | -1.6046  |
| Tdrkh         | tudor and KH domain containing protein                              | NM_028307          | -1.60207 |

|               |                                                        |                        |          |
|---------------|--------------------------------------------------------|------------------------|----------|
| Tacstd2       | tumor-associated calcium signal transducer 2           | NM_020047              | -1.60099 |
| Tec           | tec protein tyrosine kinase                            | NM_001113460           | -1.60042 |
| Scly          | selenocysteine lyase                                   | NM_016717              | -1.59996 |
| Mc1r          | melanocortin 1 receptor                                | NM_008559              | -1.59962 |
| Gpr87         | G protein-coupled receptor 87                          | NM_032399              | -1.59921 |
| Klhl30        | kelch-like 30 (Drosophila)                             | NM_027551              | -1.59911 |
| Dact1         | dapper homolog 1, antagonist of beta-catenin (xenopus) | NM_021532              | -1.59768 |
| Grhl1         | grainyhead-like 1 (Drosophila)                         | NM_001161406           | -1.59755 |
| Thrb          | thyroid hormone receptor beta                          | NM_009380              | -1.59645 |
| Ehd4          | EH-domain containing 4                                 | NM_133838              | -1.5963  |
| Klf3          | Kruppel-like factor 3 (basic)                          | NM_008453              | -1.5948  |
| Col8a1        | collagen, type VIII, alpha 1                           | NM_007739              | -1.5946  |
| Hoxc13        | homeobox C13                                           | NM_010464              | -1.59267 |
| Aqp3          | aquaporin 3                                            | NM_016689              | -1.59194 |
| Irak4         | interleukin-1 receptor-associated kinase 4             | NM_029926              | -1.59068 |
| Gm106         | predicted gene 106                                     | NM_001033288           | -1.58707 |
| Cbs           | cystathionine beta-synthase                            | NM_144855              | -1.58694 |
| Dock10        | dedicator of cytokinesis 10                            | NM_175291              | -1.58613 |
| I730030J21Rik | RIKEN cDNA I730030J21 gene                             | ENSMUST0000008925<br>2 | -1.58459 |
| Rnf128        | ring finger protein 128                                | NM_023270              | -1.58383 |
| Mlph          | melanophilin                                           | NM_053015              | -1.58285 |
| Tacc1         | transforming, acidic coiled-coil containing protein 1  | NM_177089              | -1.58058 |
| Sult2b1       | sulfotransferase family, cytosolic, 2B, member 1       | NM_017465              | -1.57843 |
| Mrps21        | mitochondrial ribosomal protein S21                    | NM_078479              | -1.57721 |
| Il1f5         | interleukin 1 family, member 5 (delta)                 | NM_001146087           | -1.57106 |
| Pip5k1b       | phosphatidylinositol-4-phosphate 5-kinase, type 1 beta | NM_008846              | -1.5667  |
| Cd63          | CD63 antigen                                           | NM_001042580           | -1.56621 |
| Egfl6         | EGF-like-domain, multiple 6                            | NM_019397              | -1.56356 |
| Dnase1l3      | deoxyribonuclease 1-like 3                             | NM_007870              | -1.56243 |
| Itm2a         | integral membrane protein 2A                           | NM_008409              | -1.56183 |
| Susd2         | sushi domain containing 2                              | NM_027890              | -1.55929 |
| D7Ertd443e    | DNA segment, Chr 7, ERATO Doi 443, expressed           | GQ499374               | -1.55884 |
| Maob          | monoamine oxidase B                                    | NM_172778              | -1.5574  |
| Cldn1         | claudin 1                                              | NM_016674              | -1.55157 |
| Nid1          | nidogen 1                                              | NM_010917              | -1.5506  |
| 5430435G22Rik | RIKEN cDNA 5430435G22 gene                             | NM_145509              | -1.55016 |
| Nceh1         | arylacetamide deacetylase-like 1                       | NM_178772              | -1.5486  |
| Eef2k         | eukaryotic elongation factor-2 kinase                  | NM_007908              | -1.54467 |
| Ostf1         | osteoclast stimulating factor 1                        | NM_017375              | -1.54424 |



|               |                                                                        |              |          |
|---------------|------------------------------------------------------------------------|--------------|----------|
| Serpinb3d     | serine (or cysteine) peptidase inhibitor, clade B (ovalbumin) member 3 | NM_201376    | -1.54375 |
| Trim71        | tripartite motif-containing 71                                         | NM_001042503 | -1.54353 |
| Lgals12       | lectin, galactose binding, soluble 12                                  | NM_019516    | -1.5435  |
| D030046N08Rik | RIKEN cDNA D030046N08 gene                                             | AK141732     | -1.54326 |
| Cds1          | CDP-diacylglycerol synthase 1                                          | NM_173370    | -1.54218 |
| Lactb2        | lactamase, beta 2                                                      | NM_145381    | -1.5418  |
| Runx3         | runt related transcription factor 3                                    | NM_019732    | -1.54153 |
| Abhd14b       | abhydrolase domain containing 14b                                      | NM_029631    | -1.54123 |
| Tinagl1       | tubulointerstitial nephritis antigen-like 1                            | NM_023476    | -1.53826 |
| Aldh3b2       | aldehyde dehydrogenase 3 family, member B2                             | NM_001177438 | -1.53793 |
| Sgpp1         | sphingosine-1-phosphate phosphatase 1                                  | NM_030750    | -1.53666 |
| Ndrg2         | N-myc downstream regulated gene 2                                      | NM_013864    | -1.5341  |
| Fam178b       | family with sequence similarity 178, member B                          | NM_201365    | -1.53347 |
| 9530008L14Rik | RIKEN cDNA 9530008L14 gene                                             | NM_175417    | -1.53333 |
| Depdc6        | DEP domain containing 6                                                | NM_001037937 | -1.53249 |
| Elavl4        | ELAV (embryonic lethal, abnormal vision, Drosophila)-like 4            | NM_010488    | -1.53164 |
| Kcnk6         | potassium inwardly-rectifying channel, subfamily K, member 6           | NM_001033525 | -1.53139 |
| Trpc1         | transient receptor potential cation channel, subfamily C, member 1     | NM_011643    | -1.53134 |
| Pdzk1ip1      | PDZK1 interacting protein 1                                            | NM_001164557 | -1.52907 |
| Tubb3         | tubulin, beta 3                                                        | NM_023279    | -1.5283  |
| Paqr5         | progesterin and adipoQ receptor family member V                        | NM_028748    | -1.52822 |
| Vegfc         | vascular endothelial growth factor C                                   | NM_009506    | -1.52594 |
| Myc           | myelocytomatosis oncogene                                              | NM_010849    | -1.52588 |
| Trim2         | tripartite motif-containing 2                                          | NM_030706    | -1.52511 |
| Trpm1         | transient receptor potential cation channel, subfamily M, member 1     | NM_001039104 | -1.52394 |
| Gstm6         | glutathione S-transferase, mu 6                                        | NM_008184    | -1.52352 |
| Gsdmc         | gasdermin C                                                            | NM_031378    | -1.52268 |
| Rapgef1       | Rap guanine nucleotide exchange factor (GEF)-like 1                    | NM_001080925 | -1.52242 |
| Tmem184a      | transmembrane protein 184a                                             | NM_001161548 | -1.52236 |
| Car6          | carbonic anhydrase 6                                                   | NM_009802    | -1.52167 |
| Krt15         | keratin 15                                                             | NM_008469    | -1.51893 |
| Dsc2          | desmocollin 2                                                          | NM_013505    | -1.51662 |
| Tcn2          | transcobalamin 2                                                       | NM_015749    | -1.51643 |
| Gstp2         | glutathione S-transferase, pi 2                                        | NM_181796    | -1.51642 |
| Lce6a         | late cornified envelope 6A                                             | NM_001166172 | -1.51564 |
| Vcan          | versican                                                               | NM_001081249 | -1.5153  |

|               |                                                             |           |          |
|---------------|-------------------------------------------------------------|-----------|----------|
| Ahnak2        | AHNAK nucleoprotein 2                                       | BC138468  | -1.51427 |
| Retsat        | retinol saturase all trans retinol 13,14 reductase          | NM_026159 | -1.51347 |
| Rapgef4       | Rap guanine nucleotide exchange factor (GEF) 4              | NM_019688 | -1.51327 |
| Gltp          | glycolipid transfer protein                                 | NM_019821 | -1.51324 |
| Mcam          | melanoma cell adhesion molecule                             | NM_023061 | -1.51124 |
| Sdr42e1       | short chain dehydrogenase/reductase family 42E, member 1    | NM_028725 | -1.51123 |
| Mmp16         | matrix metalloproteinase 16                                 | NM_019724 | -1.51108 |
| Sec11c        | SEC11 homolog C ( <i>S. cerevisiae</i> )                    | NM_025468 | -1.51074 |
| Ltbr          | lymphotoxin B receptor                                      | NM_010736 | -1.50968 |
| Sptlc3        | serine palmitoyltransferase, long chain base subunit 3      | NM_175467 | -1.50781 |
| Thbd          | thrombomodulin                                              | NM_009378 | -1.50665 |
| Il17rc        | interleukin 17 receptor C                                   | NM_134159 | -1.50461 |
| Prrg4         | proline rich Gla (G-carboxyglutamic acid) 4 (transmembrane) | NM_178695 | -1.50406 |
| 2210411K11Rik | RIKEN cDNA 2210411K11 gene                                  | NM_029384 | -1.50405 |
| Il1rap        | interleukin 1 receptor accessory protein                    | NM_008364 | -1.50257 |
| Maoa          | monoamine oxidase A                                         | NM_173740 | -1.50129 |
| Notch3        | Notch gene homolog 3 ( <i>Drosophila</i> )                  | NM_008716 | -1.50126 |
| Lmo4          | LIM domain only 4                                           | NM_010723 | -1.5007  |

**Supplementary Table S2.** Representative lists of differentially regulated genes in the **epidermis** of  $\Delta N$  embryos when compared to controls at E14.5 (**a**, downregulated and **b**, upregulated in  $\Delta N$  embryos vs. controls). Only mRNAs differentially up- or down-regulated  $\geq 1.5x$  are listed.

### Differentially expressed genes in $\Delta N$ embryos at E14.5

#### a) Downregulated in $\Delta N$ embryos:

| Genes symbol | Description                                                                      | Ref_Seq      | Fold change |
|--------------|----------------------------------------------------------------------------------|--------------|-------------|
| Frem1        | Fras1 related extracellular matrix protein 1                                     | NM_177863    | 5.3297      |
| Tnc          | tenascin C                                                                       | NM_011607    | 4.18183     |
| Cd74         | CD74 Antigen                                                                     | NM_001042605 | 3.83445     |
| Prnd         | prion protein dublet                                                             | NM_023043    | 3.69287     |
| Socs2        | suppressor of cytokine signaling 2                                               | NM_007706    | 3.64399     |
| Dkk4         | dickkopf homolog 4 ( <i>Xenopus laevis</i> )                                     | NM_145592    | 3.59292     |
| Pla2g7       | phospholipase A2, group VII (platelet-activating factor acetylhydrolase, plasma) | NM_013737    | 3.51707     |
| Slc14a1      | solute carrier family 14 (urea transporter), member 1                            | NM_001171010 | 3.42343     |
| Ly6g6c       | lymphocyte antigen 6 complex, locus G6C                                          | NM_023463    | 3.03654     |
| Foxi3        | forkhead box I3                                                                  | NM_001101464 | 2.90417     |
| Serpnb3a     | serine (or cysteine) peptidase inhibitor, clade B (ovalbumin) member 3           | NM_009126    | 2.85518     |
| Susd2        | sushi domain containing 2                                                        | NM_027890    | 2.82966     |
| Ptch1        | patched homolog 1                                                                | NM_008957    | 2.82694     |
| BC100530     | cDNA sequence BC100530                                                           | NM_001082546 | 2.80312     |
| Wif1         | Wnt inhibitory factor 1                                                          | NM_011915    | 2.77261     |
| Clca2        | chloride channel calcium activated 2                                             | NM_030601    | 2.69697     |
| Nrp2         | neuropilin 2                                                                     | NM_001077403 | 2.64097     |
| Necab1       | N-terminal EF-hand calcium binding protein 1                                     | NM_178617    | 2.63714     |
| Lypd5        | Ly6/Plaur domain containing 5                                                    | NM_029806    | 2.54125     |
| Gli1         | GLI-Kruppel family member GLI1                                                   | NM_010296    | 2.49257     |
| Trps1        | trichorhinophalangeal syndrome I (human)                                         | NM_032000    | 2.47674     |
| Dusp6        | dual specificity phosphatase 6                                                   | NM_026268    | 2.46991     |
| Il2rg        | interleukin 2 receptor, gamma chain                                              | NM_013563    | 2.4657      |
| Tspan18      | tetraspanin 18                                                                   | NM_183180    | 2.4343      |
| Serpnb2      | serine (or cysteine) peptidase inhibitor, clade B, memebr 2                      | NM_001174170 | 2.39753     |
| Tnf          | tumor necrosis factor                                                            | NM_013693    | 2.38059     |
| Acer1        | alkaline ceramidase 1                                                            | NM_175731    | 2.37223     |

|               |                                                                                     |              |         |
|---------------|-------------------------------------------------------------------------------------|--------------|---------|
| Adamts3       | a disintegrin-like and metallopeptidase with thrombospondin motifs 3                | NM_177872    | 2.21406 |
| C1s           | complement component 1, s subcomponent                                              | NM_144938    | 2.21217 |
| Rragd         | Ras-related GTP binding D                                                           | NM_027491    | 2.20995 |
| Ltb           | lymphotoxin B                                                                       | NM_008518    | 2.20462 |
| Tprg          | transformation related protein 63 regulated                                         | NM_175165    | 2.17802 |
| Sprr1b        | small proline-rich protein 1B                                                       | NM_009265    | 2.16581 |
| Stfa1         | stefin A1                                                                           | NM_001082543 | 2.16379 |
| 2610528A11Rik | RIKEN cDNA 2610528A11 gene                                                          | BC049685     | 2.13002 |
| Sdr9c7        | 4short chain dehydrogenase/reductase family 9C, member 7                            | NM_027301    | 2.12331 |
| Ptch2         | patched homolog 2                                                                   | NM_008958    | 2.11929 |
| Ncam1         | neural cell adhesion molecule 1                                                     | NM_001081445 | 2.11752 |
| Sostdc1       | sclerostin domain containing 1                                                      | NM_025312    | 2.10836 |
| Krt77         | keratin 77                                                                          | NM_001003667 | 2.0926  |
| Prss35        | protease, serine, 35                                                                | NM_178738    | 2.05754 |
| Srgap1        | SLIT-ROBO Rho GTPase activating protein 1                                           | NM_001081037 | 2.04739 |
| Fndc1         | fibronectin type III domain containing 1                                            | NM_001081416 | 2.01216 |
| D19Ertd652e   | DNA segment, Chr 19, ERATO Doi 652, expressed                                       | BC107403     | 1.98524 |
| 4833423E24Rik | RIKEN cDNA 4833423E24 gene                                                          | NM_001081664 | 1.98148 |
| Aox4          | aldehyde oxidase 4                                                                  | NM_023631    | 1.97771 |
| Tnfaip3       | tumor necrosis factor, alpha-induced protein 3                                      | NM_009397    | 1.94167 |
| Galnt6        | UDP-N-acetyl-alpha-D-galactosamine: polypeptide N-acetylgalactosaminyltransferase 6 | NM_001161767 | 1.91422 |
| 2210023G05Rik | RIKEN cDNA 2210023G05 gene                                                          | NM_197999    | 1.90753 |
| Fgd5          | FYVE, RhoGEF and PH domain containing 5                                             | NM_172731    | 1.90493 |
| Eif4e3        | eukaryotic translation initiation factor 4E member 3                                | NM_025829    | 1.89894 |
| Cyfip2        | cytoplasmic FMR1 interacting protein 2                                              | NM_133769    | 1.89842 |
| Ifitm1        | interferon induced transmembrane protein 1                                          | NM_026820    | 1.89673 |
| Cntnap1       | contactin associated protein-like 1                                                 | NM_016782    | 1.89603 |
| Egln3         | EGL nine homolog 3 (C. elegans)                                                     | NM_028133    | 1.88526 |
| Bcar3         | breast cancer anti-estrogen resistance 3                                            | NM_013867    | 1.86971 |
| Shh           | sonic hedgehog                                                                      | NM_009170    | 1.86585 |
| Madcam1       | mucosal vascular addressin cell adhesion molecule 1                                 | NM_013591    | 1.86208 |
| Mical2        | microtubule associated monooxygenase, calponin and LIM domain containing 2          | NM_177282    | 1.84081 |
| Vldlr         | very low density lipoprotein receptor                                               | NM_013703    | 1.83891 |

|               |                                                                        |              |         |
|---------------|------------------------------------------------------------------------|--------------|---------|
| Robo2         | roundabout homolog 2 (Drosophila)                                      | NM_175549    | 1.83432 |
| Cyp17a1       | cytochrome P450, family 17, subfamily a, polypeptide 1                 | NM_007809    | 1.83325 |
| Lor           | loricrin                                                               | NM_008508    | 1.83189 |
| Stfa3         | stefin A3                                                              | NM_025288    | 1.82883 |
| Serpinb3b     | serine (or cysteine) peptidase inhibitor, clade B (ovalbumin) member 3 | NM_198680    | 1.82336 |
| Clca1         | chloride channel calcium activated 1                                   | NM_009899    | 1.82303 |
| Cnfn          | cornifelin                                                             | NM_028219    | 1.81784 |
| Serpinb3c     | serine (or cysteine) peptidase inhibitor, clade B (ovalbumin) member 3 | NM_201363    | 1.80208 |
| Sdr16c5       | short chain dehydrogenase/reductase family 16C, member 5               | NM_181989    | 1.79991 |
| Etv4          | ets variant gene 4 (E1A enhancer binding protein, E1AF)                | NM_008815    | 1.79859 |
| Chl1          | cell adhesion molecule with homology to L1CAM                          | NM_007697    | 1.78983 |
| Mmp9          | matrix metalloproteinase 9                                             | NM_013599    | 1.78771 |
| Moxd1         | monooxygenase, DBH-like 1                                              | NM_021509    | 1.78575 |
| Etv5          | ets variant gene 5                                                     | NM_023794    | 1.77897 |
| 1600029D21Rik | RIKEN cDNA 1600029D21 gene                                             | NM_029639    | 1.7675  |
| Alox12b       | arachidonate 12-lipoxygenase, 12R type                                 | NM_009659    | 1.7653  |
| Tmem45a       | transmembrane protein 45a                                              | NM_019631    | 1.76028 |
| Bcl3          | B-cell leukemia/lymphoma 3                                             | NM_033601    | 1.75433 |
| Rgs5          | regulator of G-protein signaling 5                                     | NM_009063    | 1.72895 |
| Astl          | astacin-like metalloendopeptidase (M12 family)                         | NM_172539    | 1.72024 |
| Lgals3        | lectin, galactose binding, soluble 3                                   | NM_001145953 | 1.71812 |
| Ndufa4l2      | NADH dehydrogenase (ubiquinone) 1 alpha subcomplex, 4-like 2           | NM_001098789 | 1.71246 |
| Prokr2        | prokineticin receptor 2                                                | NM_144944    | 1.7097  |
| Csf1          | colony stimulating factor 1 (macrophage)                               | NM_007778    | 1.70757 |
| Mttr10        | myotubularin related protein 10                                        | NM_172742    | 1.68499 |
| Relb          | avian reticuloendotheliosis viral (v-rel) oncogene related homolog B   | NM_009046    | 1.68204 |
| Ifitm3        | interferon induced transmembrane protein 3                             | NM_025378    | 1.67277 |
| Npl           | N-acetylneuraminic acid pyruvate lyase                                 | NM_028749    | 1.67257 |
| Ephx3         | epoxide hydrolase 3                                                    | NM_001033163 | 1.67166 |
| Tmem176a      | transmembrane protein 176A                                             | NM_025326    | 1.66412 |
| Nrp1          | neuropilin 1                                                           | NM_008737    | 1.6554  |
| B2m           | beta-2 microglobulin                                                   | NM_009735    | 1.65432 |
| Aadacl2       | arylacetamide deacetylase-like 2                                       | NM_001128091 | 1.65394 |

|           |                                                                         |              |         |
|-----------|-------------------------------------------------------------------------|--------------|---------|
| Serpinb5  | serine (or cysteine) peptidase inhibitor, clade B, member 5             | NM_009257    | 1.65227 |
| Serpinb6b | serine (or cysteine) peptidase inhibitor, clade B, member 6             | NM_011454    | 1.6513  |
| Me1       | malic enzyme 1, NADP(+)-dependent, cytosolic                            | NM_008615    | 1.6483  |
| Adamts15  | a disintegrin-like and metallopeptidase with thrombospondin motifs 15   | NM_001024139 | 1.64688 |
| Sbsn      | suprabasin                                                              | NM_172205    | 1.64486 |
| Alox12e   | arachidonate lipoxygenase, epidermal                                    | NM_145684    | 1.64479 |
| Tgfb1     | transforming growth factor, beta 1                                      | NM_011577    | 1.64403 |
| Mest      | mesoderm specific transcript                                            | NM_008590    | 1.64183 |
| Setbp1    | SET binding protein 1                                                   | NM_053099    | 1.62694 |
| Steap4    | STEAP family member 4                                                   | NM_054098    | 1.62451 |
| Serpinb3d | serine (or cysteine) peptidase inhibitor, clade B (ovalbumin) member 3  | NM_201376    | 1.62108 |
| Tmem176b  | transmembrane protein 176B                                              | NM_023056    | 1.6186  |
| Ikbke     | inhibitor of kappaB kinase epsilon                                      | NM_019777    | 1.61781 |
| Elovl7    | ELOVL family member 7, elongation of long chain fatty acids             | NM_029001    | 1.61718 |
| Ankrd35   | ankyrin repeat domain 35                                                | NM_001081139 | 1.6135  |
| Cxcl11    | chemokine (C-X-C motif) ligand 11                                       | NM_019494    | 1.60827 |
| Ptges     | prostaglandin E synthase                                                | NM_022415    | 1.60778 |
| Osmr      | oncostatin M receptor                                                   | NM_011019    | 1.6042  |
| Calml3    | calmodulin-like 3                                                       | NM_027416    | 1.6038  |
| Pthlh     | parathyroid hormone-like peptide                                        | NM_008970    | 1.60116 |
| Lipm      | lipase, family member M                                                 | NM_023903    | 1.60038 |
| Orm1      | orosomuroid 1                                                           | NM_008768    | 1.59549 |
| Kcnp3     | Kv channel interacting protein 3, calsenilin                            | NM_019789    | 1.58749 |
| Phyhip    | phytanoyl-CoA hydroxylase interacting protein                           | NM_145981    | 1.57769 |
| Trim25    | tripartite motif-containing 25                                          | NM_009546    | 1.57537 |
| Serpinb12 | serine (or cysteine) peptidase inhibitor, clade B (ovalbumin) member 12 | NM_027971    | 1.57423 |
| Adra2b    | adrenergic receptor, alpha 2b                                           | NM_009633    | 1.57349 |
| Pla2g2f   | phospholipase A2, group IIF                                             | NM_012045    | 1.56977 |
| Mapk4     | mitogen-activated protein kinase 4                                      | NM_172632    | 1.56745 |
| Them5     | thioesterase superfamily member 5                                       | NM_025416    | 1.56526 |
| Glul      | glutamate-ammonia ligase (glutamine synthetase)                         | NM_008131    | 1.56162 |
| Cspg4     | chondroitin sulfate proteoglycan 4                                      | NM_139001    | 1.55824 |
| Rasgrp1   | RAS guanyl releasing protein 1                                          | NM_011246    | 1.55786 |
| F3        | coagulation factor III                                                  | NM_010171    | 1.55233 |

|          |                                                             |              |         |
|----------|-------------------------------------------------------------|--------------|---------|
| Ttc39b   | tetratricopeptide repeat domain 39B                         | NM_027238    | 1.54678 |
| Stard5   | StAR-related lipid transfer (START) domain containing 5     | NM_023377    | 1.54597 |
| Gsdmc    | gasdermin C                                                 | NM_031378    | 1.54584 |
| Trex2    | three prime repair exonuclease 2                            | NM_011907    | 1.54408 |
| Clca5    | chloride channel calcium activated 5                        | NM_178697    | 1.54023 |
| Arhgef3  | Rho guanine nucleotide exchange factor (GEF) 3              | NM_027871    | 1.53812 |
| Rdh12    | retinol dehydrogenase 12                                    | NM_030017    | 1.53806 |
| Dapl1    | death associated protein-like 1                             | NM_029723    | 1.53781 |
| Serpinb7 | serine (or cysteine) peptidase inhibitor, clade B, member 7 | NM_027548    | 1.53095 |
| Parp12   | poly (ADP-ribose) polymerase family, member 12              | NM_172893    | 1.52898 |
| Figf     | c-fos induced growth factor                                 | NM_010216    | 1.52603 |
| Bnip3    | BCL2/adenovirus E1B interacting protein 3                   | NM_009760    | 1.5244  |
| Pdzk1ip1 | PDZK1 interacting protein 1                                 | NM_001164557 | 1.52419 |
| Myb      | myeloblastosis oncogene                                     | NM_010848    | 1.52289 |
| Lhx2     | LIM homeobox protein 2                                      | NM_010710    | 1.52144 |
| Zdhhc2   | zinc finger, DHHC domain containing 2                       | NM_178395    | 1.51928 |
| Stra6    | stimulated by retinoic acid gene 6                          | NM_009291    | 1.51604 |
| Gsta1    | glutathione S-transferase, alpha 1 (Ya)                     | NM_008181    | 1.5139  |
| Acta2    | actin, alpha 2, smooth muscle, aorta                        | NM_007392    | 1.51301 |
| Car13    | carbonic anhydrase 13                                       | NM_024495    | 1.51048 |
| Krt16    | keratin 16                                                  | NM_008470    | 1.50953 |
| Acsl1    | acyl-CoA synthetase long-chain family member 1              | NM_007981    | 1.50813 |
| Gpm6b    | glycoprotein m6b                                            | NM_001177956 | 1.50714 |
| Cxcl9    | chemokine (C-X-C motif) ligand 9                            | NM_008599    | 1.5062  |
| Tnip1    | TNFAIP3 interacting protein 1                               | NM_021327    | 1.50449 |
| Itpkb    | inositol 1,4,5-trisphosphate 3-kinase B                     | NM_001081175 | 1.50267 |
| Ptgs1    | prostaglandin-endoperoxide synthase 1                       | NM_008969    | 1.50105 |
| Sox9     | SRY-box containing gene 9                                   | NM_011448    | 1.50071 |
| Acsl4    | acyl-CoA synthetase long-chain family member 4              | NM_207625    | 1.50053 |
| Cald1    | caldesmon 1                                                 | NM_145575    | 1.50041 |

**b) Upregulated in  $\Delta N$  embryos:**

| Genes symbol | gene_assignment      | Ref seq           | Fold change |
|--------------|----------------------|-------------------|-------------|
| Gm10304      | predicted gene 10304 | ENSMUST0000094945 | -3.26077    |

|               |                                                                                                               |                    |          |
|---------------|---------------------------------------------------------------------------------------------------------------|--------------------|----------|
| Mybpc1        | myosin binding protein C, slow-type                                                                           | NM_175418          | -3.25459 |
| Gm9911        | predicted gene 9911                                                                                           | AK035883           | -2.6811  |
| Pcsk2         | proprotein convertase subtilisin/kexin type 2                                                                 | NM_008792          | -2.5787  |
| Igfbp3        | insulin-like growth factor binding protein 3                                                                  | NM_008343          | -2.25564 |
| Pisd-ps2      | phosphatidylserine decarboxylase, pseudogene 2                                                                | NR_003519          | -2.21286 |
| St6galnac2    | ST6 (Alpha-N-Acetyl-Neuraminyl-2,3-Beta-Galactosyl-1,3)-N-Acetylgalactosaminide Alpha-2,6-Sialyltransferase 2 | NM_009180          | -2.20545 |
| Elmo1         | engulfment and cell motility 1, ced-12 homolog (C. elegans)                                                   | NM_080288          | -2.13654 |
| Unc5d         | unc-5 homolog D (C. elegans)                                                                                  | NM_153135          | -2.13157 |
| Lrrn1         | leucine rich repeat protein 1, neuronal                                                                       | NM_008516          | -2.10864 |
| Ano4          | anoctamin 4                                                                                                   | NM_178773          | -2.05626 |
| Jun           | Jun oncogene                                                                                                  | NM_010591          | -2.03491 |
| Kcnh7         | potassium voltage-gated channel, subfamily H (eag-related) member 7                                           | NM_133207          | -1.98255 |
| Cd68          | CD68 antigen                                                                                                  | NM_009853          | -1.89433 |
| Mir19b-1      | microRNA 19b-1                                                                                                | NR_029815          | -1.82456 |
| Gria2         | glutamate receptor, ionotropic, AMPA2 (alpha 2)                                                               | NM_013540          | -1.78212 |
| Lix1          | limb expression 1 homolog (chicken)                                                                           | NM_025681          | -1.77782 |
| Slc24a3       | solute carrier family 24 (sodium/potassium/calcium exchanger) member 3                                        | NM_053195          | -1.76643 |
| Spo11         | sporulation protein, meiosis-specific, SPO11 homolog                                                          | NM_012046          | -1.74945 |
| Cygb          | cytoglobin                                                                                                    | NM_030206          | -1.74346 |
| Igf1          | insulin-like growth factor 1                                                                                  | NM_010512          | -1.74324 |
| Npbwr1        | neuropeptides B/W receptor 1                                                                                  | NM_010342          | -1.73667 |
| Scube1        | signal peptide, CUB domain, EGF-like 1                                                                        | NM_022723          | -1.72514 |
| Slc4a4        | solute carrier family 4 (anion exchanger), member 4                                                           | NM_018760          | -1.72296 |
| 1700001P01Rik | RIKEN cDNA 1700001P01 gene                                                                                    | NM_028156          | -1.68043 |
| Plcx2         | phosphatidylinositol-specific phospholipase C, X domain containing 2                                          | NM_001134480       | -1.67512 |
| Bmp2          | bone morphogenetic protein 2                                                                                  | NM_007553          | -1.66547 |
| Lrch2         | leucine-rich repeats and calponin homology (CH) domain containing 2                                           | NM_001081173       | -1.66022 |
| B230325K18Rik | RIKEN cDNA B230325K18 gene                                                                                    | ENSMUST00000079045 | -1.65577 |
| AY512949      | cDNA sequence AY512949                                                                                        | AY512949           | -1.6508  |
| Thsd7b        | thrombospondin, type I, domain containing 7B                                                                  | NM_172485          | -1.64462 |
| Lce6a         | late cornified envelope 6A                                                                                    | NM_001166172       | -1.63186 |
| Pcdh10        | protocadherin 10                                                                                              | NM_001098171       | -1.63084 |



|            |                                                                      |                    |          |
|------------|----------------------------------------------------------------------|--------------------|----------|
| Sprr2a1    | small proline-rich protein 2A1                                       | AY158986           | -1.61029 |
| Fam38b     | family with sequence similarity 38, member B                         | NM_001039485       | -1.6021  |
| Mirlet7c-1 | microRNA let7c-1                                                     | NR_029728          | -1.59206 |
| Cd96       | CD96 antigen                                                         | NM_032465          | -1.58805 |
| Snora75    | small nucleolar RNA, H/ACA box 75                                    | NR_028478          | -1.56597 |
| Pcdh17     | protocadherin 17                                                     | NM_001013753       | -1.56052 |
| Ripply3    | rippy3 homolog (zebrafish)                                           | NM_133229          | -1.55827 |
| Cdh6       | cadherin 6                                                           | NM_007666          | -1.55706 |
| Dusp1      | dual specificity phosphatase 1                                       | NM_013642          | -1.55033 |
| Tagln3     | transgelin 3                                                         | NM_019754          | -1.54993 |
| Col19a1    | collagen, type XIX, alpha 1                                          | NM_007733          | -1.54267 |
| Nkain2     | Na <sup>+</sup> /K <sup>+</sup> transporting ATPase interacting 2    | NM_001013411       | -1.52611 |
| Gm12703    | predicted gene 12703                                                 | ENSMUST00000064804 | -1.526   |
| Baalc      | brain and acute leukemia, cytoplasmic                                | NM_080640          | -1.51608 |
| Ica1       | islet cell autoantigen 1                                             | NM_010492          | -1.51287 |
| Igfbp2     | insulin-like growth factor binding protein 2                         | NM_008342          | -1.51232 |
| Snhg1      | small nucleolar RNA host gene (non-protein coding) 1                 | AK051045           | -1.51117 |
| Gpx6       | glutathione peroxidase 6                                             | NM_145451          | -1.51012 |
| Taf1d      | TATA box binding protein (Tbp)-associated factor, RNA polymerase I D | AK161656           | -1.50123 |
| Adam1a     | a disintegrin and metallopeptidase domain 1a                         | NM_172126          | -1.50059 |

**Supplementary Table S3. Upper table:** Number of NF- $\kappa$ B binding sites and cross-species conservation of all primary hair follicle placode-specific NF- $\kappa$ B target genes that have been analysed by qRT-PCR and ChIP (*Lhx2*, *Sox9*, *Mmp9*, *Trps1*) using an anti-p65 antibody. The right column indicates whether a particular gene was also bound by NF- $\kappa$ B subunits in Hodgkin's lymphoma cell lines (E. Kärigel and C. Scheidereit, unpublished). Previously unknown NF- $\kappa$ B targets are marked in green (see also <http://www.bu.edu/nf-kb/gene-resources/target-genes/>). **Lower table:** Cross-species conservation and number of LHX2 binding sites in NF- $\kappa$ B targets *Nrp2* and *Prokr2*.

| Gene symbol | Number of potential NF- $\kappa$ B binding sites - JASPER (> 90%) | Cross species conservation - ECR browser Dcode | ChIP peak of NF- $\kappa$ B subunits in Hodgkin lymphoma |
|-------------|-------------------------------------------------------------------|------------------------------------------------|----------------------------------------------------------|
| Adamts3     | 3                                                                 | Binding sites are conserved in Muroidea        | -                                                        |
| Adamts15    | 6                                                                 | Binding sites are conserved in Muroidea        | -                                                        |
| Ascl4       | 0                                                                 | -                                              | -                                                        |
| Bcl3        | 5                                                                 | Binding sites are conserved up to Metatheria   | Yes                                                      |
| Bmp2        | 2                                                                 | Binding sites are conserved in Mammals         | -                                                        |
| Cd74        | 4                                                                 | Binding sites are conserved up to Metatheria   | Yes                                                      |
| Cxcl9       | 8                                                                 | Binding sites are conserved in Mammals         | -                                                        |
| Cxcl11      | 7                                                                 | Binding sites are conserved in Mammals         | -                                                        |
| Dkk4        | 2                                                                 | -                                              | -                                                        |
| Dusp6       | 2                                                                 | Binding sites are conserved in Vertebrata      | Yes                                                      |
| Etv4        | 3                                                                 | Binding sites are conserved up to Metatheria   | Yes                                                      |
| Etv5        | 1                                                                 | -                                              | -                                                        |
| Fndc1       | 17                                                                | Binding sites are conserved in Muroidea        | -                                                        |
| Foxi3       | 0                                                                 | -                                              | -                                                        |
| Frem1       | 10                                                                | Binding sites are conserved in Mammals         | -                                                        |
| Galnt6      | 7                                                                 | Binding sites are conserved in Mammals         | Yes                                                      |
| Gli1        | 2                                                                 | Binding sites are conserved in Mammals         | Yes                                                      |
| Krt17       | 5                                                                 | Binding sites are conserved in Muroidea        | -                                                        |
| Lhx2        | 7                                                                 | Binding sites are conserved in Mammals         | Yes                                                      |
| Ltb         | 1                                                                 | Binding site is conserved in Mammals           | Yes                                                      |
| Madcam1     | 3                                                                 | Binding sites are conserved in Muroidea        | Yes                                                      |
| Mical2      | 18                                                                | Binding sites are conserved in Muroidea        | Yes                                                      |
| Mmp9        | 3                                                                 | Binding sites are conserved in Mammals         | Yes                                                      |
| Ncam1       | 26                                                                | Binding sites are conserved in Mammals         | Yes                                                      |
| Nrp2        | 16                                                                | Binding sites are conserved in Mammals         | Yes                                                      |
| Prokr2      | 5                                                                 | Binding sites are conserved in Muroidea        | -                                                        |
| Prss35      | 3                                                                 | -                                              | -                                                        |
| Ptch1       | 2                                                                 | Binding sites are conserved in Mammals         | Yes                                                      |
| Ptch2       | 5                                                                 | -                                              | -                                                        |
| Pthlh       | 2                                                                 | Binding sites are conserved in Mammals         | Yes                                                      |

|              |                       |                                           |                       |
|--------------|-----------------------|-------------------------------------------|-----------------------|
| Robo2        | 32                    | Binding sites are conserved in Muroidea   | Yes                   |
| Scube1       | 20                    | Binding sites are conserved in Muroidea   | Yes                   |
| Shh          | 4                     | Binding sites are conserved in Mammals    | Yes                   |
| Socs2        | 3                     | Binding sites are conserved in Mammals    | -                     |
| Sox9         | 2                     | Binding sites are conserved in Mammals    | Yes                   |
| Sox21        | 2                     | Binding sites are conserved in Vertebrata | -                     |
| Srgap1       | 3                     | Binding sites are conserved in Mammals    | Yes                   |
| Tgfb1        | 2                     | Binding sites are conserved in Muroidea   | Yes                   |
| Tnc          | 3                     | Binding sites are conserved in Mammals    | Yes                   |
| Tnf          | 3                     | Binding sites are conserved in Mammals    | Yes                   |
| Tnfaip3      | 9                     | Binding sites are conserved up to Aves    | Yes                   |
| Trps1        | 7                     | Binding sites are conserved up to Aves    | Yes                   |
| Tsku         | 3                     | -                                         | -                     |
| Tspan18      | 18                    | Binding sites are conserved in Mammals    | Yes                   |
| Wif1         | 3                     | Binding sites are conserved in Muroidea   | -                     |
| Wnt2b        | 1                     | Binding site is conserved in Mammals      | -                     |
| <b>Total</b> | <b>44 of 46 ~ 96%</b> |                                           | <b>26 of 46 ~ 57%</b> |

| <b>Gene symbol</b> | <b>Number of potential LHX2 binding sites - JASPER (&gt; 90%)</b> | <b>Cross species conservation - ECR browser Dcode</b> |
|--------------------|-------------------------------------------------------------------|-------------------------------------------------------|
| Nrp2               | 6                                                                 | Binding sites are conserved in Muroidea               |
| Prokr2             | 1                                                                 | Binding sites are not conserved                       |

**Supplementary Table S4.** List of genes specifically upregulated in the interfollicular epidermis (IFE), but down-regulated by NF- $\kappa$ B in hair follicle placodes at E14.5.

**Genes specifically upregulated in the interfollicular epidermis (IFE) and down-regulated by NF- $\kappa$ B in hair follicle placodes**

| <b>Genes symbol</b> | <b>Description</b>                            | <b>Ref seq</b> | <b>Fold change (WT vs. <math>\Delta N</math>)</b> | <b>Fold change (HF vs IFE)</b> |
|---------------------|-----------------------------------------------|----------------|---------------------------------------------------|--------------------------------|
| Pcsk2               | proprotein convertase subtilisin/kexin type 2 | NM_008792      | -2.5787                                           | -2.04744                       |
| Igfbp3              | insulin-like growth factor binding protein 3  | NM_008343      | -2.25564                                          | -1.70523                       |
| Igf1                | insulin-like growth factor 1                  | NM_010512      | -1.74324                                          | -2.19222                       |
| Npbwr1              | neuropeptides B/W receptor 1                  | NM_010342      | -1.73667                                          | -1.9776                        |
| Lce6a               | late cornified envelope 6A                    | NM_001166172   | -1.63186                                          | -1.51564                       |
| Ica1                | islet cell autoantigen 1                      | NM_010492      | -1.51287                                          | -1.69649                       |
